# Supplementary material for: Plant diversity maintains multiple soil functions in future environments
Source: eLife journal article supplement (doi:10.7554/elife.41228), 2018-11-28
Supplement: supp [file elife_poa_e41228_Figure_4_figure_supplement_4.docx]

**Figure 4-figure supplement 4.** Plant species richness and CO2 effects on ***Functional Dispersion*** in the BioCON experiment. For statistical results see main text. Means with 95% confidence intervals.
