# Supplementary material for: Plant diversity maintains multiple soil functions in future environments
Source: eLife. 2018 Nov 28;7:e41228. doi: 10.7554/eLife.41228 (PMC6296783; doi:10.7554/eLife.41228)
Supplement: Supplementary file 3. [file elife-41228-supp3.xls]

## Sheet: Meta-Data
Abbreviation in Data table	Description (for methods see main text; for questions contact nico.eisenhauer@idiv.de)
ID	Plot ID
ring	Ring in experimental design
CO2	CO2 treatment; 0=ambient, 1=elevated
Ntreat	N treatment; 0=ambient, 1=elevated
Diversity	Sown plant species richness
lnPSR	Ln of sown plant species richness
WSA	Water-stable soil aggregates
logWSA	Log water-stable soil aggregates
BR	Soil basal respiration
Cmic	Soil microbial biomass C
percH2O	Soil water content
logBR	Log basal respiration
logCmic	Log soil microbial biomass C
logH2O	Log soil water content
Root	Root biomass
logRB	Log root biomass
AchilleaMillefolium	Presence of species; 0=no, 1=yes
AgropyronRepens	Presence of species; 0=no, 1=yes
AmorphaCanescens	Presence of species; 0=no, 1=yes
AndropogonGerardi	Presence of species; 0=no, 1=yes
AnemoneCylindrica	Presence of species; 0=no, 1=yes
AsclepiasTuberosa	Presence of species; 0=no, 1=yes
BoutelouaGracilis	Presence of species; 0=no, 1=yes
BromusInermis	Presence of species; 0=no, 1=yes
KoeleriaCristata	Presence of species; 0=no, 1=yes
LespedezaCapitata	Presence of species; 0=no, 1=yes
LupinusPerennis	Presence of species; 0=no, 1=yes
PetalostemumVillosum	Presence of species; 0=no, 1=yes
PoaPratensis	Presence of species; 0=no, 1=yes
SchizachyriumScoparium	Presence of species; 0=no, 1=yes
SolidagoRigida	Presence of species; 0=no, 1=yes
SorghastrumNutans	Presence of species; 0=no, 1=yes
WSAstd	Water stable aggregates, standardized
BRstd	Soil basal respiration, standardized
Cmicstd	Soil microbial biomass C, standardized
Rootstd	Root biomass, standardized
meanFunction	Average ecosystem multifunctionality
ShannonEMF	Shannon diversity index of the four individual soil functions
EvenEMF	Shannon evenness index of the four individual soil functions
SimpsonEMF	Simpson index of the four individual soil functions
SpeciesCountFromCover	Realized plant species richness based on cover data
AbovegroundTotalBiomass	Plant shoot biomass
FRic.site	Functional richness
FEve.site	Functional evenness
FDiv.site	Functional divergence
FDis.site	Functional dispersion
shannon	Shannon diversity index of plants
simpson	Simpson index of plants
th20	Number of functions at or above a 20% threshold of the maximum observed function
th40	Number of functions at or above a 40% threshold of the maximum observed function
th60	Number of functions at or above a 60% threshold of the maximum observed function
th80	Number of functions at or above a 80% threshold of the maximum observed function

## Sheet: Data
ID	ring	CO2	Ntreat	Diversity	lnPSR	WSA	logWSA	BR	Cmic	percH2O	logBR	logCmic	logH2O	Root	logRB	AchilleaMillefolium	AgropyronRepens	AmorphaCanescens	AndropogonGerardi	AnemoneCylindrica	AsclepiasTuberosa	BoutelouaGracilis	BromusInermis	KoeleriaCristata	LespedezaCapitata	LupinusPerennis	PetalostemumVillosum	PoaPratensis	SchizachyriumScoparium	SolidagoRigida	SorghastrumNutans	WSAstd	BRstd	Cmicstd	Rootstd	meanFunction	ShannonEMF	EvenEMF	SimpsonEMF	SpeciesCountFromCover	FRic.site	FEve.site	FDiv.site	FDis.site	shannon	simpson	th20	th40	th60
1	1	1	0	4	1.38629	44.6072	1.6494	1.18	187.32	3.9	0.0713105	2.27259	0.590652	216.172	2.3348	1	0	0	0	0	1	0	0	1	0	0	0	1	0	0	0	0.611513	0.538813	0.426542	0.0784431	0.413828	1.22715	0.885198	1.74022	4	2.29122	0.888176	0.714445	1.52722	1.27308	0.692817	3	3	3
2	1	1	0	1	0	55.4373	1.7438	0.65	95.86	4.1	-0.187315	1.98163	0.611811	686.469	2.83662	0	0	0	0	0	0	1	0	0	0	0	0	0	0	0	0	0.759981	0.296804	0.21828	0.249102	0.381042	1.23996	0.894443	1.93727	1	0		0	0	0	0	4	2	1
4	1	1	0	4	1.38629	55.1347	1.74142	0.67	80.31	4.5	-0.170507	1.90478	0.651742	471.947	2.67389	0	0	0	0	1	1	0	0	0	0	0	1	0	0	0	1	0.755832	0.305936	0.182872	0.171257	0.353974	1.18598	0.8555	2.16876	3	5.51553	0.976319	0.883041	2.02384	1.28707	0.695006	4	2	1
5	1	1	0	1	0	53.028	1.72451	0.28	109.63	3.7	-0.557163	2.03994	0.57271	44.5545	1.64889	0	0	0	0	0	1	0	0	0	0	0	0	0	0	0	0	0.726953	0.127854	0.249636	0.0161677	0.280152	0.924074	0.666579	4.79725	1	0		0	0	0	0	3	1	1
6	1	1	0	4	1.38629	55.2474	1.74231	0.68	121.78	5.1	-0.16538	2.08559	0.703509	607.261	2.78338	0	0	0	1	0	0	1	0	0	0	0	0	0	1	0	1	0.757378	0.310502	0.277302	0.220359	0.391385	1.25472	0.905091	1.86975	4	1.8586	0.9235	0.892655	2.12618	0.965655	0.58625	4	3	1
8	1	1	1	1	0	50.9312	1.70698	0.16	79.88	0.9	-0.781172	1.90244	-0.0287166	877.888	2.94344	0	0	0	0	0	0	0	0	0	0	0	0	0	1	0	0	0.698208	0.0730594	0.181893	0.318563	0.317931	1.11824	0.806639	2.8646	1	0		0	0	0	0	3	2	2
9	1	1	0	4	1.38629	54.1935	1.73395	0.53	128.31	3.1	-0.277998	2.10827	0.491844	339.934	2.53139	0	1	0	0	0	0	0	1	1	0	0	0	1	0	0	0	0.74293	0.242009	0.292171	0.123353	0.350116	1.18063	0.851648	2.22918	4	0.293019	0.758719	0.687825	0.952718	1.0417	0.628099	3	3	1
10	1	1	1	4	1.38629	52.3736	1.71911	0.38	122.83	3.3	-0.416329	2.0893	0.521031	407.591	2.61022	1	0	0	0	1	0	0	0	1	0	0	0	0	0	0	1	0.717982	0.173516	0.279693	0.147904	0.329774	1.17211	0.845498	2.59981	2	0		0	0	0	0	4	3	1
12	1	1	1	9	2.19722	52.2618	1.71818	0.63	157.13	4.3	-0.203321	2.19627	0.636272	465.347	2.66778	1	0	0	1	0	1	1	1	0	1	0	1	0	1	0	1	0.716448	0.287671	0.357797	0.168862	0.382695	1.25242	0.903431	1.95777	4	0.826061	0.564768	0.937418	0.658772	0.367695	0.163743	4	3	3
13	1	1	1	16	2.77259	49.8252	1.69745	1	151.27	5	-0.00165179	2.17976	0.696007	1273.93	3.10514	1	1	1	1	1	1	1	1	1	1	1	1	1	1	1	1	0.683045	0.456621	0.344453	0.462275	0.486599	1.35552	0.977803	1.50975	7	6.66507	0.579482	0.971091	1.91711	0.810099	0.405994	4	4	3
14	1	1	0	4	1.38629	51.8859	1.71505	0.49	87.68	3.6	-0.308621	1.94292	0.557031	1056.11	3.02371	0	0	0	0	1	0	0	0	0	0	0	1	1	1	0	0	0.711296	0.223744	0.199654	0.383234	0.379482	1.25174	0.902943	1.98603	3	3.56407	0.711623	0.873951	1.51709	1.12849	0.659062	4	2	1
15	1	1	0	4	1.38629	55.8269	1.74684	0.53	147.26	3.4	-0.277549	2.16807	0.536875	191.419	2.28199	0	1	0	0	1	0	0	0	0	0	0	0	0	0	1	1	0.765322	0.242009	0.335322	0.0694611	0.353029	1.12385	0.810684	2.1179	2				0.949475	0.648279	0.455807	3	3	1
16	1	1	0	9	2.19722	51.4287	1.71121	0.79	208.74	3.7	-0.0993343	2.31961	0.572757	433.993	2.63748	1	1	0	0	1	1	0	0	0	1	0	1	0	1	1	1	0.705028	0.360731	0.475317	0.157485	0.42464	1.27091	0.91677	1.69162	6	4.20491	0.704412	0.725409	1.42076	1.4426	0.699263	4	3	3
18	1	1	1	1	0	51.2247	1.70948	0.46	70.22	4.6	-0.332854	1.84648	0.667403	47.8548	1.67993	0	0	1	0	0	0	0	0	0	0	0	0	0	0	0	0	0.70223	0.210046	0.159896	0.0173653	0.272384	0.948054	0.683876	6.39619	1	0		0	0	0	0	3	2	1
19	1	1	0	4	1.38629	54.3769	1.73541	0.56	151.01	5.1	-0.250714	2.179	0.709761	453.795	2.65686	0	0	0	0	0	0	0	1	0	1	0	0	0	1	0	1	0.745443	0.255708	0.343861	0.164671	0.377421	1.22785	0.885703	1.96594	4	1.63067	0.962084	0.875346	1.01751	0.657356	0.369813	4	3	1
21	1	1	1	9	2.19722	54.2127	1.7341	0.65	159.93	4.9	-0.189394	2.20394	0.691159	549.505	2.73997	0	1	1	1	0	1	0	1	0	0	0	1	1	1	0	1	0.743193	0.296804	0.364173	0.199401	0.400893	1.26452	0.912156	1.81701	6	0.922252	0.583402	0.839635	1.52084	0.736897	0.418968	4	3	3
22	1	1	1	1	0	54.1217	1.73337	0.52	114.09	3.3	-0.280362	2.05724	0.515631	427.393	2.63083	0	0	0	0	0	0	0	1	0	0	0	0	0	0	0	0	0.741945	0.237443	0.259791	0.15509	0.348567	1.19452	0.861666	2.26586	1	0		0	0	0	0	4	3	1
23	1	1	0	16	2.77259	58.1025	1.76419	0.67	122.84	5.3	-0.173826	2.08934	0.723998	1660.07	3.22013	1	1	1	1	1	1	1	1	1	1	1	1	1	1	1	1	0.796518	0.305936	0.279716	0.602395	0.496141	1.2927	0.932486	1.41732	6	9.94049	0.626208	0.911863	2.11798	1.13724	0.541874	4	4	2
24	1	1	0	1	0	51.5023	1.71183	1.44	235.56	4.8	0.15776	2.37209	0.681465	424.092	2.62746	0	1	0	0	0	0	0	0	0	0	0	0	0	0	0	0	0.706036	0.657534	0.536388	0.153892	0.513463	1.27651	0.920805	1.37498	1	0		0	0	0	0	4	3	3
26	1	1	0	9	2.19722	47.6741	1.67828	0.65	155.44	3.8	-0.189188	2.19156	0.576969	36.3036	1.55995	1	1	1	0	0	0	1	0	1	0	1	0	1	1	0	1	0.653557	0.296804	0.353948	0.0131737	0.329371	1.08268	0.780985	2.61807	6	1.59005	0.98761	0.829601	1.62747	1.08784	0.659581	3	3	1
27	1	1	0	4	1.38629	52.911	1.72355	0.56	124.34	3.4	-0.248299	2.09463	0.537203	136.964	2.13661	1	0	0	0	1	1	0	0	0	0	0	0	0	0	1	0	0.725348	0.255708	0.283131	0.0497006	0.328472	1.10113	0.794297	2.55121	4	1.56389	0.777376	0.932261	1.4479	0.895529	0.476852	3	3	1
29	1	1	1	4	1.38629	45.4878	1.6579	0.56	54.61	5.1	-0.252154	1.73731	0.708135	250.825	2.39937	0	0	1	0	1	1	0	0	0	0	1	0	0	0	0	0	0.623585	0.255708	0.124351	0.091018	0.273665	1.11413	0.803673	6.95112	1	1.9488	0.689056	0.798154	1.76002	1.26471	0.690504	3	2	2
30	1	1	1	16	2.77259	56.6308	1.75305	0.8	153.75	4.1	-0.0979257	2.18681	0.617094	826.733	2.91737	1	1	1	1	1	1	1	1	1	1	1	1	1	1	1	1	0.776343	0.365297	0.3501	0.3	0.447935	1.30486	0.941255	1.59427	5	10.499	0.732763	0.91308	2.46237	1.36851	0.640076	4	4	3
31	1	1	1	1	0	47.1138	1.67315	0.54	121.81	2.3	-0.268402	2.0857	0.368487	67.6568	1.83031	0	0	0	0	0	1	0	0	0	0	0	0	0	0	0	0	0.645875	0.246575	0.27737	0.0245509	0.298593	1.07707	0.776944	3.75199	1	0		0	0	0	0	3	3	2
32	1	1	1	1	0	56.4906	1.75198	0	110.92	2.8	-3	2.04501	0.450628	381.188	2.58114	0	0	0	0	0	0	1	0	0	0	0	0	0	0	0	0	0.77442	0	0.252573	0.138323	0.291329	0.855938	0.779108	3.50544	1	0		0	0	0	0	3	2	1
33	1	1	0	16	2.77259	54.4009	1.73561	0.78	209.1	5.3	-0.108566	2.32036	0.728111	564.356	2.75155	1	1	1	1	1	1	1	1	1	1	1	1	1	1	1	1	0.745773	0.356164	0.476136	0.20479	0.445716	1.28748	0.928723	1.59552	9	9.94049	0.805878	0.886578	2.61192	1.71369	0.764019	4	3	3
35	1	1	0	1	0	49.5454	1.695	0.55	88.46	2.6	-0.257809	1.94673	0.410641	90.7591	1.95789	0	0	0	0	0	0	0	0	0	1	0	0	0	0	0	0	0.679209	0.251142	0.20143	0.0329341	0.291179	1.04962	0.757139	4.12052	1	0		0	0	0	0	3	2	1
36	1	1	1	1	0	53.0464	1.72466	0.56	45.65	4.5	-0.251373	1.65945	0.650918	442.244	2.64566	0	1	0	0	0	0	0	0	0	0	0	0	0	0	0	0	0.727204	0.255708	0.103948	0.160479	0.311835	1.11035	0.800945	2.9985	1	0		0	0	0	0	3	2	2
37	1	1	1	1	0	46.7162	1.66947	0.37	74.67	2.2	-0.428461	1.87316	0.348174	130.363	2.11515	0	0	0	0	0	0	0	0	0	0	0	1	0	0	0	0	0.640424	0.16895	0.170029	0.0473054	0.256677	1.03093	0.743655	21.3077	1	0		0	0	0	0	3	2	1
38	1	1	1	4	1.38629	58.5435	1.76748	0	102.81	0.4	-3	2.01204	-0.361768	524.752	2.71995	0	0	0	1	0	0	0	0	0	0	1	1	0	0	0	1	0.802563	0	0.234106	0.190419	0.306772	0.882878	0.80363	2.76531	2				0.569159	0.212826	0.103852	3	2	1
39	1	1	0	1	0	52.1147	1.71696	0.64	125.11	2.5	-0.19522	2.0973	0.399725	265.677	2.42435	0	0	0	0	0	0	0	1	0	0	0	0	0	0	0	0	0.714432	0.292237	0.284885	0.0964072	0.34699	1.18015	0.8513	2.30311	1	0		0	0	0	0	3	3	1
40	1	1	0	1	0	42.4859	1.62824	0.4	118.57	1.5	-0.401172	2.07398	0.179416	275.578	2.44024	0	0	0	0	0	0	0	0	0	0	0	0	1	0	0	0	0.582432	0.182648	0.269993	0.1	0.283768	1.19195	0.859812	5.43254	1	0		0	0	0	0	3	1	1
41	1	1	1	4	1.38629	44.7785	1.65107	1	267.53	4.3	-0.000610111	2.42737	0.630886	623.762	2.79502	0	1	0	0	0	0	0	1	1	0	0	0	1	0	0	0	0.613861	0.456621	0.609186	0.226347	0.476504	1.32482	0.955654	1.52021	3	2.45203	0.921891	0.724276	1.03571	0.790268	0.461538	4	4	3
42	1	1	0	1	0	55.7745	1.74644	1.19	251.9	4.3	0.0772939	2.40123	0.629234	244.224	2.38779	0	0	0	0	0	0	0	0	0	0	0	0	0	0	1	0	0.764603	0.543379	0.573595	0.0886228	0.49255	1.22135	0.881017	1.39417	1	0		0	0	0	0	3	3	3
43	1	1	1	16	2.77259	51.6671	1.71321	0.63	126.42	2.6	-0.201068	2.10182	0.407959	798.68	2.90237	1	1	1	1	1	1	1	1	1	1	1	1	1	1	1	1	0.708296	0.287671	0.287868	0.28982	0.393414	1.29229	0.932187	1.91096	5				1.88831	0.568633	0.380746	4	4	2
44	1	1	1	4	1.38629	52.1775	1.71748	0.73	44.03	2.9	-0.135051	1.64371	0.469795	518.152	2.71446	0	0	0	0	0	0	0	0	0	0	1	1	0	0	1	1	0.715293	0.333333	0.10026	0.188024	0.334227	1.15107	0.830322	2.48473	2				0.330957	0.282739	0.149938	3	2	2
45	1	1	0	16	2.77259	47.5062	1.67675	1.26	297.94	4.9	0.100705	2.47413	0.692443	976.898	2.98985	1	1	1	1	1	1	1	1	1	1	1	1	1	1	1	1	0.651255	0.575342	0.678432	0.354491	0.56488	1.35871	0.980103	1.32272	6	9.94049	0.705615	0.927544	2.0544	1.15355	0.528541	4	4	3
46	1	1	0	1	0	52.484	1.72003	0.42	48.53	2.8	-0.377866	1.68597	0.446816	326.733	2.51419	0	0	0	0	1	0	0	0	0	0	0	0	0	0	0	0	0.719495	0.191781	0.110506	0.118563	0.285086	1.05192	0.758802	4.49674	1	0		0	0	0	0	2	1	1
47	1	1	1	1	0	49.2806	1.69268	0.4	44.95	4	-0.396449	1.65274	0.598957	42.9043	1.6325	0	0	0	0	0	0	0	0	1	0	0	0	0	0	0	0	0.67558	0.182648	0.102354	0.0155689	0.244038	0.870797	0.628148	-19.4326	1	0		0	0	0	0	2	2	1
49	1	1	1	1	0	36.7606	1.56538	0.43	87.86	2.5	-0.365266	1.94379	0.400104	140.264	2.14695	1	0	0	0	0	0	0	0	0	0	0	0	0	0	0	0	0.503945	0.196347	0.200064	0.0508982	0.237813	1.14684	0.827269	-12.2871	1	0		0	0	0	0	3	2	0
51	1	1	0	16	2.77259	57.4544	1.75932	1.12	298.81	3.3	0.0478633	2.47539	0.517753	919.142	2.96338	1	1	1	1	1	1	1	1	1	1	1	1	1	1	1	1	0.787634	0.511416	0.680413	0.333533	0.578249	1.33971	0.966394	1.28215	5	9.94049	0.720974	0.917567	2.64024	1.63546	0.764691	4	4	3
52	1	1	1	16	2.77259	49.0697	1.69081	0.58	136.76	3	-0.238004	2.13597	0.472766	1026.4	3.01132	1	1	1	1	1	1	1	1	1	1	1	1	1	1	1	1	0.672689	0.26484	0.311413	0.372455	0.405349	1.31574	0.949105	1.8566	4	10.0574	0.800617	0.905217	2.08289	1.21532	0.571663	4	4	3
53	1	1	1	1	0	47.1954	1.6739	0.88	195.25	4.4	-0.0559223	2.2906	0.638839	108.911	2.03707	0	0	0	0	0	0	0	0	0	0	0	0	0	0	1	0	0.646993	0.401826	0.444599	0.039521	0.383235	1.16834	0.842781	1.92249	1	0		0	0	0	0	3	3	3
54	1	1	1	4	1.38629	52.0478	1.7164	0.65	133.06	4.3	-0.185939	2.12404	0.629367	1232.67	3.09085	0	0	0	1	0	0	1	0	0	0	0	0	0	1	0	1	0.713515	0.296804	0.302988	0.447305	0.440153	1.31712	0.950099	1.65081	3	0		0	0	0	0	4	4	3
56	1	1	0	4	1.38629	51.3516	1.71055	1.07	97.27	4.8	0.0285962	1.98796	0.681686	1084.16	3.03509	0	0	1	0	0	0	0	0	0	1	1	1	0	0	0	0	0.70397	0.488584	0.221491	0.393413	0.451865	1.31002	0.944981	1.59566	4	3.3723	0.878106	0.750903	2.151	1.21962	0.684497	4	3	3
57	1	1	0	1	0	53.5238	1.72855	1.08	200.81	3.5	0.0354287	2.30279	0.53963	310.231	2.49169	0	0	0	0	0	0	0	0	0	0	0	0	0	1	0	0	0.733748	0.493151	0.457259	0.112575	0.449183	1.24243	0.896221	1.55423	1	0		0	0	0	0	3	3	3
58	1	1	1	4	1.38629	45.4886	1.6579	0.74	235.54	2.4	-0.1324	2.37206	0.38379	574.257	2.75911	0	1	0	0	0	0	0	0	0	0	1	0	1	0	1	0	0.623596	0.3379	0.536342	0.208383	0.426555	1.30914	0.944342	1.72374	4	2.13045	0.758122	0.685004	1.40307	1.26352	0.684762	4	3	3
59	1	1	1	4	1.38629	46.9541	1.67167	0.61	119.25	4.7	-0.210846	2.07644	0.673403	259.076	2.41343	0	0	0	0	0	0	1	1	0	0	0	1	0	0	1	0	0.643686	0.278539	0.271541	0.094012	0.321944	1.19708	0.863509	2.92472	4	2.94211	0.539252	0.623872	1.48644	1.12458	0.637119	3	3	2
60	1	1	1	1	0	55.9425	1.74774	0	63.92	0	-3	1.80561	-3	757.426	2.87934	0	0	0	1	0	0	0	0	0	0	0	0	0	0	0	0	0.766907	0	0.145551	0.27485	0.296827	0.878343	0.799502	3.25923	1	0		0	0	0	0	3	2	1
62	2	0	0	4	1.38629	45.2203	1.65533	0.39	84.58	0.8	-0.405911	1.92725	-0.109898	240.924	2.38188	0	0	1	0	0	0	0	0	1	0	0	0	0	1	1	0	0.619917	0.178082	0.192595	0.0874251	0.269505	1.12705	0.812996	8.3392	3	0.530313	0.745018	0.882075	1.86262	0.937488	0.561114	4	1	1
63	2	0	0	4	1.38629	55.1427	1.74149	0.65	195.05	2.4	-0.189463	2.29015	0.372266	272.277	2.43501	0	0	0	0	0	0	1	0	0	0	0	0	1	0	1	1	0.755943	0.296804	0.444143	0.0988024	0.398923	1.19501	0.862018	1.76706	3	1.42198	0.439003	0.761136	1.45141	0.750393	0.462278	4	3	3
64	2	0	1	16	2.77259	58.9267	1.77031	0.54	167.53	1.4	-0.262837	2.2241	0.132909	443.894	2.64728	1	1	1	1	1	1	1	1	1	1	1	1	1	1	1	1	0.807816	0.246575	0.381478	0.161078	0.399237	1.20661	0.870385	1.747	5	9.814	0.833864	0.93766	2.34108	1.10819	0.551154	4	3	2
65	2	0	1	9	2.19722	50.7982	1.70585	0.92	226.61	4	-0.034287	2.35528	0.601613	754.125	2.87744	1	1	1	0	0	0	1	0	1	0	1	0	0	1	1	1	0.696385	0.420091	0.516008	0.273653	0.476534	1.33357	0.961968	1.52313	5				1.03044	0.640561	0.448342	4	4	3
67	2	0	0	16	2.77259	52.579	1.72081	0.2	148.43	3.7	-0.690401	2.17151	0.563205	727.723	2.86197	1	1	1	1	1	1	1	1	1	1	1	1	1	1	1	1	0.720797	0.0913242	0.337986	0.264072	0.353545	1.17587	0.848211	2.19907	6	6.42665	0.750009	0.972539	1.82434	0.790087	0.401108	4	3	2
68	2	0	1	1	0	52.3805	1.71917	0	64.93	0.2	-3	1.81241	-0.605499	363.036	2.55995	0	0	0	0	0	0	0	0	0	0	0	0	0	1	0	0	0.718076	0	0.14785	0.131737	0.249416	0.786965	0.716326	-188.918	1	0		0	0	0	0	3	1	1
69	2	0	0	16	2.77259	52.5181	1.72031	0	84.63	0	-3	1.92751	-1.3393	468.647	2.67085	1	1	1	1	1	1	1	1	1	1	1	1	1	1	1	1	0.719962	0	0.192709	0.17006	0.270683	0.869283	0.791255	6.56323	8	6.42665	0.933081	0.919476	2.74228	1.26059	0.689827	3	1	1
70	2	0	0	1	0	53.9683	1.73214	0.56	90.5	3.6	-0.247892	1.95666	0.554991	435.644	2.63913	0	0	0	1	0	0	0	0	0	0	0	0	0	0	0	0	0.739842	0.255708	0.206075	0.158084	0.339927	1.18154	0.852298	2.38929	1	0		0	0	0	0	4	2	1
71	2	0	1	1	0	54.8876	1.73947	0.41	66.52	2.1	-0.38672	1.82298	0.325429	389.439	2.59044	0	0	0	0	0	0	0	0	0	0	0	0	0	0	0	1	0.752446	0.187215	0.151471	0.141317	0.308112	1.0935	0.788793	3.05358	1	0		0	0	0	0	4	1	1
72	2	0	1	1	0	50.5004	1.70329	0.45	60.46	3.2	-0.345518	1.78149	0.508708	1933.99	3.28645	0	0	0	0	0	0	0	0	0	0	0	1	0	0	0	0	0.692302	0.205479	0.137672	0.701796	0.434312	1.1862	0.855662	1.54988	1	0		0	0	0	0	4	3	2
74	2	0	1	4	1.38629	57.1323	1.75688	0.46	93.68	2.7	-0.339566	1.97166	0.432556	188.119	2.27443	0	0	1	0	0	0	0	0	0	1	1	1	0	0	0	0	0.783218	0.210046	0.213316	0.0682635	0.318711	1.0523	0.759071	2.61861	3	0.36464	0.826876	0.777642	2.05586	1.08818	0.659746	3	2	1
75	2	0	1	4	1.38629	50.3158	1.7017	0	115.69	0.3	-3	2.0633	-0.560711	372.937	2.57164	0	0	1	0	1	0	0	0	0	0	1	0	0	1	0	0	0.689771	0	0.263435	0.135329	0.272134	0.891652	0.811617	6.44795	3				2.1771	0.654391	0.461747	3	2	1
76	2	0	1	4	1.38629	54.7261	1.73819	0.55	134.63	2.4	-0.261021	2.12914	0.380689	887.789	2.94831	0	0	0	1	0	0	1	0	0	0	0	0	0	1	0	1	0.750231	0.251142	0.306563	0.322156	0.407523	1.27999	0.923318	1.78513	4				2.19254	0.681406	0.488304	4	4	1
77	2	0	0	1	0	47.7165	1.67867	0.28	53	2.4	-0.555944	1.72428	0.377206	11.5512	1.06263	0	0	0	0	1	0	0	0	0	0	0	0	0	0	0	0	0.654138	0.127854	0.120685	0.00419162	0.226717	0.805089	0.580749	-4.30491	0	0	0	0	0	0	0	3	1	1
78	2	0	0	4	1.38629	44.5868	1.64921	0.63	133.76	2.7	-0.202412	2.12634	0.431177	325.083	2.51199	1	0	0	0	1	0	0	0	0	0	1	0	0	0	1	0	0.611233	0.287671	0.304581	0.117964	0.330362	1.24247	0.896256	2.7854	1				0.865423	0.566653	0.378937	4	3	2
79	2	0	1	4	1.38629	51.0408	1.70792	0.9	269.01	3	-0.0465427	2.42977	0.472053	1103.96	3.04295	0	1	0	0	0	1	0	1	0	0	0	1	0	0	0	0	0.69971	0.410959	0.612556	0.400599	0.530956	1.35685	0.978757	1.38949	4	2.17011	0.999783	0.710839	1.81081	0.898205	0.561224	4	4	4
80	2	0	0	4	1.38629	51.3699	1.71071	0.3	57.79	2.9	-0.515499	1.76183	0.46259	1034.65	3.01479	0	1	0	0	0	0	0	1	1	0	0	0	1	0	0	0	0.704222	0.136986	0.131592	0.375449	0.337062	1.15468	0.832927	2.43821	4	2.2909	0.658155	0.745471	1.13018	1.23917	0.680851	4	2	2
81	2	0	1	1	0	46.5257	1.66769	0.69	142.81	3.3	-0.159374	2.15475	0.51256	846.535	2.92764	0	0	0	0	0	0	1	0	0	0	0	0	0	0	0	0	0.637813	0.315068	0.325189	0.307186	0.396314	1.33038	0.959668	1.9475	1	0		0	0	0	0	4	4	2
82	2	0	0	4	1.38629	42.888	1.63234	0.95	207.58	3.5	-0.02233	2.31719	0.540254	833.333	2.92082	0	0	0	0	0	1	0	0	1	0	0	0	1	0	0	1	0.587945	0.43379	0.472675	0.302395	0.449201	1.35985	0.980924	1.66221	3	4.47198	0.602755	0.641882	1.30814	1.14557	0.672866	4	4	4
83	2	0	0	9	2.19722	50.5997	1.70415	1.38	287.36	4.8	0.138876	2.45843	0.685042	504.95	2.70325	1	1	1	0	1	1	0	0	1	0	1	1	0	1	0	0	0.693663	0.630137	0.65434	0.183234	0.540343	1.29504	0.934174	1.32723	4	1.93191	0.916319	0.537372	1.33794	1.20162	0.671544	4	4	3
85	2	0	1	4	1.38629	54.2608	1.73449	0.65	153.4	2.5	-0.186014	2.18581	0.398114	452.145	2.65528	0	0	1	0	0	0	1	0	0	1	0	0	0	0	0	1	0.743852	0.296804	0.349303	0.164072	0.388508	1.24173	0.895721	1.887	1				0.116295	0.114665	0.0475907	4	3	1
86	2	0	1	4	1.38629	37.3931	1.57279	0.9	233.63	3.2	-0.0473484	2.36853	0.508975	866.337	2.93769	1	0	0	0	0	1	1	0	0	0	0	1	0	0	0	0	0.512615	0.410959	0.531993	0.314371	0.442485	1.36619	0.985497	1.70184	1	0		0	0	0	0	4	4	3
88	2	0	1	4	1.38629	53.683	1.72984	0.46	116.8	3.6	-0.335324	2.06743	0.558953	514.851	2.71168	0	0	1	0	1	0	0	1	0	0	0	0	0	1	0	0	0.735931	0.210046	0.265962	0.186826	0.349691	1.20712	0.870754	2.26827	3	0.560061	0.873311	0.861602	1.64289	1.01964	0.618408	4	3	1
89	2	0	0	4	1.38629	50.0886	1.69974	0.98	225.98	2.7	-0.00657856	2.35406	0.437932	161.716	2.20875	1	0	0	0	1	1	0	0	0	0	0	0	0	0	1	0	0.686657	0.447489	0.514573	0.0586826	0.42685	1.1946	0.861722	1.63538	2	0		0	0	0	0	3	3	3
90	2	0	0	1	0	54.2053	1.73404	0.48	70.23	4.3	-0.317454	1.84653	0.631821	275.578	2.44024	0	0	0	0	0	0	0	0	0	0	0	0	0	0	0	1	0.743091	0.219178	0.159919	0.1	0.305547	1.08164	0.780235	3.15938	1	0		0	0	0	0	4	2	1
91	2	0	1	4	1.38629	50.775	1.70565	0.63	130.4	4.1	-0.198181	2.11529	0.613562	394.389	2.59593	1	0	1	1	0	0	0	0	0	0	1	0	0	0	0	0	0.696066	0.287671	0.296931	0.143114	0.355945	1.23083	0.887858	2.23948	2				0.352204	0.146145	0.0644444	4	3	1
93	2	0	0	4	1.38629	48.1328	1.68244	0.59	101.16	3.8	-0.23024	2.00502	0.579894	239.274	2.3789	0	0	1	0	0	0	0	0	0	1	1	1	0	0	0	0	0.659845	0.269406	0.230349	0.0868263	0.311607	1.16542	0.840672	3.20689	3	0.668762	0.95683	0.943006	2.31933	0.887211	0.548697	4	3	1
94	2	0	1	1	0	48.7448	1.68793	0.43	36.64	3	-0.361659	1.56391	0.477681	198.02	2.29671	0	0	0	0	0	1	0	0	0	0	0	0	0	0	0	0	0.668234	0.196347	0.083432	0.0718563	0.254967	0.985906	0.711181	26.7917	1	0		0	0	0	0	2	1	1
95	2	0	1	4	1.38629	45.8559	1.6614	0.54	121.96	3.1	-0.265985	2.08621	0.498295	165.017	2.21753	1	0	0	0	1	1	0	0	0	0	0	0	0	0	1	0	0.628631	0.246575	0.277712	0.0598802	0.3032	1.15057	0.829964	3.61977	2				0.421738	0.239217	0.120708	3	3	1
96	2	0	1	1	0	51.5793	1.71248	0.41	93.89	4.1	-0.386543	1.97262	0.615044	135.314	2.13134	0	0	0	0	0	0	0	0	0	0	1	0	0	0	0	0	0.707092	0.187215	0.213795	0.0491018	0.289301	1.04176	0.75147	4.15562	1	0		0	0	0	0	3	1	1
97	2	0	1	9	2.19722	50.6411	1.7045	0.53	111.78	3.6	-0.275625	2.04835	0.554382	475.248	2.67692	1	1	1	0	0	1	0	1	1	1	0	1	0	0	0	1	0.69423	0.242009	0.254531	0.172455	0.340806	1.22541	0.883947	2.47059	5	0.132787	0.536136	0.902082	1.21032	0.779468	0.44642	4	3	1
98	2	0	1	4	1.38629	54.2038	1.73403	0.64	94.41	4.3	-0.190357	1.97502	0.638372	1290.43	3.11073	0	1	0	0	0	0	0	1	1	0	0	0	1	0	0	0	0.743071	0.292237	0.214979	0.468263	0.429638	1.2781	0.921957	1.6604	4				0.974027	0.653418	0.4608	4	3	2
99	2	0	1	1	0	48.4928	1.68568	0.41	97.28	3	-0.389071	1.988	0.478237	127.063	2.10402	0	0	0	0	0	0	0	0	0	0	0	0	0	0	1	0	0.66478	0.187215	0.221514	0.0461078	0.279904	1.0605	0.764989	5.41625	1	0		0	0	0	0	3	1	1
100	2	0	0	1	0	49.945	1.69849	0.33	100.17	2.5	-0.473759	2.00072	0.39245	47.8548	1.67993	0	0	0	0	0	0	0	0	0	0	1	0	0	0	0	0	0.684688	0.150685	0.228095	0.0173653	0.270208	0.958575	0.691466	7.1465	1	0		0	0	0	0	3	1	1
101	2	0	1	1	0	58.7824	1.76925	0.82	155.55	4.9	-0.0880586	2.19186	0.69024	866.337	2.93769	0	0	0	1	0	0	0	0	0	0	0	0	0	0	0	0	0.805838	0.374429	0.354199	0.314371	0.462209	1.3032	0.940059	1.53205	1	0		0	0	0	0	4	4	2
102	2	0	0	1	0	42.4153	1.62752	0.3	68.77	2.6	-0.528324	1.83738	0.415572	339.934	2.53139	0	0	0	0	0	0	0	0	0	0	0	1	0	0	0	0	0.581465	0.136986	0.156594	0.123353	0.2496	1.13629	0.819658	-375.446	1	0		0	0	0	0	4	1	1
103	2	0	1	1	0	49.1359	1.6914	0.4	70.3	2.5	-0.393432	1.84698	0.39176	308.581	2.48937	0	0	0	0	0	0	0	1	0	0	0	0	0	0	0	0	0.673595	0.182648	0.160078	0.111976	0.282075	1.10905	0.800009	5.16586	1	0		0	0	0	0	3	1	1
104	2	0	0	16	2.77259	54.5011	1.73641	0.96	173.23	4.5	-0.0153675	2.23863	0.652942	1011.55	3.00499	1	1	1	1	1	1	1	1	1	1	1	1	1	1	1	1	0.747147	0.438356	0.394458	0.367066	0.486757	1.34125	0.967504	1.49152	8	9.62351	0.840079	0.829155	2.59718	1.55858	0.764802	4	4	4
105	2	0	0	4	1.38629	51.038	1.70789	0.65	120.87	3.7	-0.186002	2.08233	0.563498	740.924	2.86977	0	0	0	1	0	0	1	0	0	0	0	0	0	1	0	1	0.699672	0.296804	0.27523	0.268862	0.385142	1.28811	0.929173	1.97852	4	1.6899	0.547779	0.780704	1.68851	1.00226	0.598622	4	4	3
106	2	0	0	9	2.19722	53.9093	1.73166	0.89	193.06	3.5	-0.0493983	2.28569	0.542609	628.713	2.79845	0	1	0	1	0	1	1	0	1	0	1	0	1	1	0	1	0.739033	0.406393	0.439612	0.228144	0.453295	1.30536	0.941622	1.58093	8	8.48379	0.908932	0.849792	2.54687	1.40261	0.71862	4	4	3
107	2	0	0	16	2.77259	62.5377	1.79614	0.87	213.63	4.6	-0.0595191	2.32965	0.660298	1102.31	3.0423	1	1	1	1	1	1	1	1	1	1	1	1	1	1	1	1	0.857319	0.39726	0.486451	0.4	0.535258	1.32913	0.958768	1.34858	6	11.4864	0.233275	0.677379	2.24216	1.66514	0.80093	4	4	4
108	2	0	1	16	2.77259	57.5569	1.7601	0.44	116.01	3.3	-0.355113	2.06451	0.515472	863.036	2.93603	1	1	1	1	1	1	1	1	1	1	1	1	1	1	1	1	0.789039	0.200913	0.264163	0.313174	0.391822	1.23072	0.887779	1.82834	5	9.814	0.725002	0.933817	2.39725	1.32599	0.661271	4	3	1
109	2	0	0	1	0	53.8682	1.73133	0.39	68.72	4.9	-0.404632	1.8371	0.691547	306.931	2.48704	0	0	0	0	0	0	0	1	0	0	0	0	0	0	0	0	0.73847	0.178082	0.156481	0.111377	0.296102	1.06916	0.771235	3.61183	1	0		0	0	0	0	4	1	1
110	2	0	1	16	2.77259	63.5317	1.80299	0.52	129.4	4.3	-0.283098	2.11193	0.634905	792.079	2.89877	1	1	1	1	1	1	1	1	1	1	1	1	1	1	1	1	0.870946	0.237443	0.294653	0.287425	0.422617	1.22313	0.882302	1.60495	7	9.814	0.828834	0.819581	2.52017	1.37597	0.744913	4	4	1
111	2	0	0	1	0	57.5983	1.76041	0.44	75.01	4.3	-0.358207	1.87514	0.631342	328.383	2.51638	0	1	0	0	0	0	0	0	0	0	0	0	0	0	0	0	0.789606	0.200913	0.170803	0.119162	0.320121	1.07841	0.77791	2.59615	1	0		0	0	0	0	4	2	1
112	2	0	1	1	0	49.8428	1.6976	2.19	146.8	3.6	0.341092	2.16671	0.553311	419.142	2.62236	0	1	0	0	0	0	0	0	0	0	0	0	0	0	0	0	0.683287	1	0.334275	0.152096	0.542414	1.19535	0.862264	1.22378	1	0		0	0	0	0	4	3	2
113	2	0	1	1	0	53.7192	1.73013	0.56	88.14	2.7	-0.25444	1.94515	0.425413	462.046	2.66469	0	0	0	0	0	0	0	0	0	0	0	0	1	0	0	0	0.736428	0.255708	0.200701	0.167665	0.340125	1.18676	0.856063	2.39541	1	0		0	0	0	0	4	2	1
114	2	0	1	4	1.38629	54.7823	1.73864	0.44	124.95	2.6	-0.357119	2.09674	0.418116	706.271	2.84897	0	0	0	0	0	1	0	1	0	1	0	0	0	0	1	0	0.751001	0.200913	0.28452	0.256287	0.373181	1.23401	0.890147	2.00846	4	2.00911	0.977976	0.628593	1.99119	1.05791	0.639053	4	2	1
115	2	0	0	1	0	54.9155	1.7397	0.42	64.82	4.8	-0.378862	1.8117	0.678478	902.64	2.95551	0	0	0	0	0	0	0	0	0	0	0	0	1	0	0	0	0.752828	0.191781	0.1476	0.327545	0.354938	1.18051	0.851555	2.15304	1	0		0	0	0	0	4	3	2
116	2	0	0	1	0	54.2211	1.73417	0.29	33.77	3.5	-0.529849	1.52859	0.545676	102.31	2.00992	0	0	0	0	0	0	0	0	0	1	0	0	0	0	0	0	0.743308	0.13242	0.0768968	0.0371257	0.247438	0.805819	0.581276	-39.6544	1	0		0	0	0	0	2	1	1
118	2	0	1	16	2.77259	57.1977	1.75738	0.63	75.37	3.4	-0.197181	1.87721	0.532343	831.683	2.91996	1	1	1	1	1	1	1	1	1	1	1	1	1	1	1	1	0.784114	0.287671	0.171623	0.301796	0.386301	1.22026	0.880233	1.86305	9	3.64709	0.949763	0.834213	1.86043	1.36859	0.717284	4	3	1
120	2	0	0	4	1.38629	53.9139	1.7317	0.44	81.11	4.2	-0.356437	1.90909	0.618186	404.29	2.60669	1	1	0	0	0	0	0	0	1	0	0	1	0	0	0	0	0.739097	0.200913	0.184694	0.146707	0.317852	1.13632	0.819679	2.82322	2	2.46156	0.913306	0.900821	1.68577	1.04813	0.635336	4	2	1
121	2	0	0	4	1.38629	53.9683	1.73214	0.49	79.87	4	-0.305871	1.90237	0.600724	458.746	2.66157	0	1	0	1	0	0	0	0	1	0	0	0	0	1	0	0	0.739842	0.223744	0.18187	0.166467	0.327981	1.16056	0.837169	2.59745	3				1.58969	0.669328	0.476371	4	2	1
122	2	0	0	1	0	47.9872	1.68113	0.38	51.6	4.5	-0.415007	1.71268	0.649532	122.112	2.08676	0	0	0	0	0	0	0	0	1	0	0	0	0	0	0	0	0.657848	0.173516	0.117497	0.0443114	0.248293	0.968915	0.698924	-74.8823	1	0		0	0	0	0	3	1	1
123	3	1	1	1	0	39.0807	1.59196	0.54	131.21	4.1	-0.265803	2.11795	0.617278	1077.56	3.03244	0	0	0	0	0	0	0	0	0	0	0	0	0	0	0	1	0.535751	0.246575	0.298775	0.391018	0.36803	1.34294	0.968723	2.26922	1	0		0	0	0	0	4	4	3
124	3	1	1	4	1.38629	46.6141	1.66852	0.46	126.56	3	-0.336284	2.10229	0.480895	1311.88	3.11789	0	0	0	1	0	0	1	0	0	0	0	0	0	1	0	1	0.639025	0.210046	0.288187	0.476048	0.403326	1.30008	0.937812	1.86024	3	0		0	0	0	0	4	4	2
125	3	1	1	4	1.38629	35.2465	1.54712	0.47	158.76	3.1	-0.322977	2.20075	0.489939	273.927	2.43764	0	0	0	0	0	1	0	0	0	1	0	1	0	0	1	0	0.483188	0.214612	0.361508	0.0994012	0.289677	1.25114	0.902505	5.01641	4	3.03759	0.475258	0.825774	0.892042	0.70261	0.344184	3	3	1
126	3	1	0	1	0	44.445	1.64782	0.48	137.17	4.2	-0.316671	2.13727	0.623062	1026.4	3.01132	0	0	0	0	0	0	0	0	0	0	0	0	0	0	0	1	0.609289	0.219178	0.312346	0.372455	0.378317	1.31687	0.949921	2.10429	1	0		0	0	0	0	4	3	1
127	3	1	1	4	1.38629	45.9538	1.66232	0.42	136.84	3.7	-0.378207	2.13621	0.573559	1795.38	3.25416	0	1	0	0	0	0	0	1	1	1	0	0	0	0	0	0	0.629973	0.191781	0.311595	0.651497	0.446211	1.27984	0.923208	1.59226	4				1.66009	0.686211	0.49308	4	4	2
129	3	1	0	4	1.38629	43.2945	1.63643	0.43	106.79	5.2	-0.370351	2.02853	0.718768	1013.2	3.0057	0	1	0	0	1	0	0	0	0	0	0	0	1	1	0	0	0.593517	0.196347	0.243169	0.367665	0.350174	1.29434	0.933666	2.45312	3	2.55877	0.542306	0.972893	0.628706	0.549704	0.267889	4	2	1
130	3	1	1	16	2.77259	40.6215	1.60876	0.62	197.15	6.1	-0.205984	2.29479	0.783405	1042.9	3.01824	1	1	1	1	1	1	1	1	1	1	1	1	1	1	1	1	0.556873	0.283105	0.448925	0.378443	0.416837	1.35721	0.979021	1.83791	6	6.66507	0.143489	0.989975	0.480665	0.226152	0.097194	4	4	4
132	3	1	1	1	0	42.6646	1.63007	0.28	126.6	4.3	-0.554962	2.10244	0.633446	212.871	2.32812	0	0	0	0	0	0	0	0	0	0	0	0	0	1	0	0	0.584882	0.127854	0.288278	0.0772455	0.269565	1.12617	0.812356	8.47483	1	0		0	0	0	0	3	2	1
133	3	1	0	9	2.19722	38.5643	1.58619	0.39	170.35	2.3	-0.407136	2.23134	0.364609	422.442	2.62577	1	0	0	0	0	0	1	1	1	0	0	1	1	1	1	1	0.528672	0.178082	0.3879	0.153293	0.311987	1.26248	0.910684	3.46514	8	4.2029	0.720637	0.91002	1.74965	1.68306	0.789943	4	2	1
134	3	1	0	1	0	36.6176	1.56369	0.38	84.39	3.5	-0.418761	1.92629	0.549794	39.604	1.59774	0	0	0	0	0	0	0	0	1	0	0	0	0	0	0	0	0.501985	0.173516	0.192162	0.0143713	0.220509	1.03973	0.750009	-4.40902	1	0		0	0	0	0	3	1	0
135	3	1	0	1	0	38.6764	1.58745	0.42	107.51	5	-0.375996	2.03146	0.70301	184.818	2.26675	0	0	0	0	0	0	0	0	0	0	1	0	0	0	0	0	0.530208	0.191781	0.244808	0.0670659	0.258466	1.17354	0.846529	19.6101	1	0		0	0	0	0	3	1	1
136	3	1	1	4	1.38629	34.0076	1.53158	0.28	108.28	2	-0.554411	2.03454	0.294682	300.33	2.4776	1	0	0	0	1	1	0	0	0	0	0	0	0	0	1	0	0.466205	0.127854	0.246562	0.108982	0.237401	1.21781	0.878465	-12.4406	3	0.853338	0.517921	0.945459	0.841585	0.513943	0.258585	4	2	0
137	3	1	1	1	0	42.4286	1.62766	0.26	64.07	2.7	-0.591447	1.80665	0.429367	338.284	2.52928	0	0	0	0	0	0	0	0	0	1	0	0	0	0	0	0	0.581646	0.118721	0.145892	0.122754	0.242254	1.1104	0.800984	-18.3254	1	0		0	0	0	0	4	1	1
138	3	1	0	1	0	40.1009	1.60315	0.31	89.23	4.8	-0.513658	1.95049	0.680107	485.149	2.68587	0	0	0	0	0	0	0	0	0	0	0	0	1	0	0	0	0.549736	0.141553	0.203183	0.176048	0.26763	1.22203	0.881511	9.95444	1	0		0	0	0	0	4	1	1
139	3	1	0	1	0	42.66	1.63002	0.31	77.21	3.3	-0.511414	1.88766	0.52327	198.02	2.29671	0	0	0	0	0	0	0	0	0	0	0	1	0	0	0	0	0.584818	0.141553	0.175813	0.0718563	0.24351	1.08792	0.784771	-21.7761	1	0		0	0	0	0	3	1	1
140	3	1	0	1	0	46.8157	1.67039	0.47	135.35	4.7	-0.322479	2.13145	0.676721	787.129	2.89605	0	0	0	1	0	0	0	0	0	0	0	0	0	0	0	0	0.641789	0.214612	0.308202	0.285629	0.362558	1.29266	0.932455	2.24929	1	0		0	0	0	0	4	3	1
141	3	1	1	1	0	39.487	1.59645	0.45	132.74	2.9	-0.348588	2.12302	0.466433	445.545	2.64889	0	0	0	0	0	0	0	0	0	0	1	0	0	0	0	0	0.541321	0.205479	0.302259	0.161677	0.302684	1.27621	0.920592	3.97079	1	0		0	0	0	0	4	3	1
142	3	1	1	1	0	38.1934	1.58199	0.2	37.08	3.9	-0.694091	1.56915	0.591595	16.5017	1.21753	0	0	0	0	1	0	0	0	0	0	0	0	0	0	0	0	0.523588	0.0913242	0.0844339	0.00598802	0.176333	0.780462	0.562984	-1.00004	0	0	0	0	0	0	0	2	1	1
143	3	1	1	1	0	40.0445	1.60254	0.41	160.56	2.7	-0.390023	2.20563	0.430142	292.079	2.4655	0	0	0	0	0	0	0	0	0	0	0	0	0	0	1	0	0.548963	0.187215	0.365607	0.105988	0.301943	1.22263	0.881942	3.89493	1	0		0	0	0	0	4	3	2
144	3	1	1	1	0	42.3402	1.62675	0.61	181.95	5.3	-0.210938	2.25995	0.720659	1196.37	3.07787	0	1	0	0	0	0	0	0	0	0	0	0	0	0	0	0	0.580435	0.278539	0.414314	0.434132	0.426855	1.35439	0.976989	1.77228	1	0		0	0	0	0	4	4	4
145	3	1	0	1	0	43.9616	1.64307	0.5	127.52	5.4	-0.297265	2.10557	0.729234	645.215	2.8097	0	1	0	0	0	0	0	0	0	0	0	0	0	0	0	0	0.602662	0.228311	0.290373	0.234132	0.338869	1.29378	0.933264	2.66241	1	0		0	0	0	0	4	2	1
146	3	1	0	1	0	43.3799	1.63729	0.25	54.86	3.6	-0.595769	1.73926	0.560819	28.0528	1.44798	0	0	0	0	1	0	0	0	0	0	0	0	0	0	0	0	0.594688	0.114155	0.12492	0.0101796	0.210986	0.853327	0.615545	-2.50446	0	0	0	0	0	0	0	1	1	1
147	3	1	0	16	2.77259	44.6856	1.65017	0.47	157.78	6.4	-0.325304	2.19804	0.809141	623.762	2.79502	1	1	1	1	1	1	1	1	1	1	1	1	1	1	1	1	0.612587	0.214612	0.359277	0.226347	0.353206	1.29018	0.930667	2.39082	7	11.6667	0.541157	0.87751	2.32311	1.43532	0.6759	4	2	1
148	3	1	0	4	1.38629	41.5776	1.61886	0.54	143.01	5.8	-0.266502	2.15536	0.767105	636.964	2.80411	0	0	0	1	0	1	0	0	0	1	0	0	0	1	0	0	0.569981	0.246575	0.325644	0.231138	0.343335	1.31449	0.948205	2.61529	3				1.61266	0.534632	0.350057	4	3	1
150	3	1	0	4	1.38629	43.8988	1.64245	0.55	169.18	5.5	-0.261605	2.22836	0.744007	297.03	2.4728	0	0	1	0	0	0	0	0	0	1	1	1	0	0	0	0	0.601802	0.251142	0.385235	0.107784	0.336491	1.23339	0.889705	2.63362	3	1.30777	0.907049	0.71609	1.99288	1.08718	0.659035	3	3	1
151	3	1	1	16	2.77259	39.617	1.59788	0.51	142.76	5.4	-0.293985	2.15461	0.733506	1044.55	3.01893	1	1	1	1	1	1	1	1	1	1	1	1	1	1	1	1	0.543102	0.232877	0.325075	0.379042	0.370024	1.34063	0.967057	2.2406	4	5.76248	0.330723	0.976767	0.92849	0.390603	0.18307	4	4	2
152	3	1	0	4	1.38629	39.365	1.59511	0.38	82.38	3.2	-0.419777	1.91582	0.502055	1099.01	3.041	0	0	0	1	0	0	1	0	0	0	0	0	0	1	0	1	0.539648	0.173516	0.187585	0.398802	0.324888	1.2757	0.920222	3.01394	4	0.797155	0.483635	0.687476	0.840724	0.86696	0.502191	4	2	2
153	3	1	0	1	0	38.0484	1.58034	0.49	125.52	4.5	-0.308235	2.09873	0.653204	231.023	2.36366	0	0	0	0	0	0	0	0	0	0	0	0	0	0	1	0	0.521599	0.223744	0.285818	0.0838323	0.278749	1.2212	0.880907	6.49181	1	0		0	0	0	0	3	2	1
154	3	1	1	4	1.38629	37.9076	1.57873	0.35	107.65	3.5	-0.448678	2.03202	0.548565	821.782	2.91476	0	0	0	0	1	0	0	0	0	1	0	0	1	0	0	1	0.519669	0.159817	0.245127	0.298204	0.305704	1.29591	0.9348	3.85618	3	0.679074	0.628965	0.752592	1.18281	1.00162	0.599286	4	3	1
155	3	1	0	4	1.38629	43.884	1.64231	0.31	83.77	4.3	-0.504017	1.92311	0.62887	790.429	2.89786	1	0	1	0	0	0	0	0	1	0	0	0	0	0	0	1	0.601599	0.141553	0.190751	0.286826	0.305182	1.22892	0.886476	3.67254	3	0.248713	0.413938	0.343013	0.897109	0.68639	0.429417	4	2	1
156	3	1	0	4	1.38629	48.3602	1.68449	0.47	178.74	4.2	-0.326639	2.25222	0.628293	452.145	2.65528	0	0	1	0	1	1	0	0	0	0	0	0	0	0	1	0	0.662962	0.214612	0.407004	0.164072	0.362163	1.24399	0.897351	2.1855	2				1.73105	0.689521	0.496378	4	2	1
157	3	1	0	4	1.38629	40.8832	1.61154	0.57	158.02	3.9	-0.246684	2.1987	0.587833	308.581	2.48937	0	1	0	0	0	0	0	1	1	0	0	0	1	0	0	0	0.560461	0.260274	0.359823	0.111976	0.323134	1.25294	0.903805	3.03291	4	0.293019	0.48544	0.78228	0.744455	0.813092	0.468113	3	3	1
158	3	1	1	1	0	51.2344	1.70956	0.33	77.31	4.9	-0.485058	1.88825	0.693015	242.574	2.38484	0	0	1	0	0	0	0	0	0	0	0	0	0	0	0	0	0.702364	0.150685	0.176041	0.088024	0.279278	1.05338	0.759855	5.29838	1	0		0	0	0	0	3	1	1
159	3	1	0	1	0	39.3647	1.59511	0.41	94.73	4	-0.390161	1.97647	0.603425	146.865	2.16692	1	0	0	0	0	0	0	0	0	0	0	0	0	0	0	0	0.539645	0.187215	0.215707	0.0532934	0.248965	1.13423	0.818175	-149.435	1	0		0	0	0	0	3	1	1
160	3	1	1	1	0	40.8182	1.61085	0.26	71.92	3.8	-0.589339	1.85687	0.580573	110.561	2.0436	0	0	0	0	0	1	0	0	0	0	0	0	0	0	0	0	0.55957	0.118721	0.163767	0.0401198	0.220545	1.01182	0.729875	-4.06578	1	0		0	0	0	0	3	1	1
161	3	1	1	9	2.19722	40.7396	1.61002	0.31	111.03	2	-0.50661	2.04545	0.301715	1155.12	3.06263	0	1	1	1	1	0	0	0	1	1	0	1	1	0	0	1	0.558492	0.141553	0.252824	0.419162	0.343007	1.27413	0.919092	2.56819	4	1.67546	0.586482	0.980084	0.768715	0.390693	0.174262	4	3	2
162	3	1	1	4	1.38629	44.9459	1.65269	0	102.49	0.2	-3	2.01069	-0.739157	798.68	2.90237	0	1	0	1	0	0	0	1	0	0	0	1	0	0	0	0	0.616155	0	0.233377	0.28982	0.284838	1.00544	0.915186	4.9128	3	0		0	0	0	0	3	3	1
163	3	1	0	16	2.77259	48.5297	1.68601	0.57	164.09	5.2	-0.241325	2.21509	0.714867	679.868	2.83242	1	1	1	1	1	1	1	1	1	1	1	1	1	1	1	1	0.665286	0.260274	0.373645	0.246707	0.386478	1.29891	0.936965	1.98952	10	9.28148	0.758178	0.884893	2.15974	1.36376	0.623	4	3	1
164	3	1	0	4	1.38629	41.7775	1.62094	0.24	73.92	4.6	-0.624653	1.86874	0.658515	534.653	2.72807	0	0	0	0	0	0	1	1	0	0	1	0	0	0	1	0	0.57272	0.109589	0.168321	0.194012	0.261161	1.17285	0.846036	14.6945	3	1.4397	0.828174	0.250252	0.424828	0.4346	0.20898	3	1	1
167	3	1	1	4	1.38629	45.7254	1.66016	0.32	91.9	3.3	-0.492995	1.96333	0.515799	1481.85	3.1708	0	0	0	0	0	0	0	0	0	1	0	1	1	0	1	0	0.626841	0.146119	0.209263	0.537725	0.379987	1.23103	0.888002	1.97777	3	0.456836	0.239621	0.955771	0.675802	0.581885	0.312017	4	2	2
168	3	1	1	4	1.38629	34.8284	1.54193	0.36	105.08	3.7	-0.444622	2.02153	0.566918	1097.36	3.04035	0	1	0	0	0	0	0	1	1	0	0	0	1	0	0	0	0.477457	0.164384	0.239275	0.398204	0.31983	1.30833	0.94376	3.2626	4	2.89354	0.756828	0.903724	1.5195	1.14701	0.624198	4	4	1
169	3	1	0	1	0	40.0194	1.60227	0.23	55.85	1	-0.629029	1.747	0.00552557	145.215	2.16201	0	0	1	0	0	0	0	0	0	0	0	0	0	0	0	0	0.54862	0.105023	0.127175	0.0526946	0.208378	0.997711	0.719696	-2.62145	1	0		0	0	0	0	1	1	1
170	3	1	0	9	2.19722	34.0085	1.53159	0.27	116.27	1.5	-0.56706	2.06548	0.170625	582.508	2.7653	1	0	0	0	1	0	0	1	1	1	0	1	1	1	1	0	0.466217	0.123288	0.264755	0.211377	0.266409	1.27805	0.921918	11.2694	6	3.97452	0.69839	0.91667	1.76953	1.6437	0.771665	4	1	0
171	3	1	1	9	2.19722	37.8313	1.57785	0.68	214.63	5.3	-0.167658	2.33168	0.723929	833.333	2.92082	1	1	0	1	1	0	1	1	1	1	0	0	0	0	0	1	0.518622	0.310502	0.488728	0.302395	0.405062	1.35605	0.978185	1.92001	4	2.04803	0.231128	0.977938	0.576892	0.311201	0.139613	4	4	3
172	3	1	0	4	1.38629	32.2021	1.50788	0.47	137.13	3.6	-0.327782	2.13713	0.553808	655.116	2.81632	1	0	0	0	1	1	0	0	0	0	0	0	0	0	1	0	0.441453	0.214612	0.312255	0.237725	0.301511	1.34502	0.970229	4.26396	3				0.299618	0.187031	0.0880473	4	2	0
173	3	1	0	16	2.77259	39.1762	1.59302	0.57	135.34	7.3	-0.241532	2.13144	0.861211	481.848	2.68291	1	1	1	1	1	1	1	1	1	1	1	1	1	1	1	1	0.53706	0.260274	0.308179	0.17485	0.320091	1.30298	0.939901	3.22483	7	9.94049	0.765398	0.832968	1.81455	1.11511	0.525391	4	3	1
174	3	1	1	1	0	41.4225	1.61724	0.44	107.53	5.4	-0.356766	2.03154	0.73402	399.34	2.60134	0	0	0	0	0	0	0	1	0	0	0	0	0	0	0	0	0.567855	0.200913	0.244854	0.14491	0.289633	1.24184	0.8958	4.89163	1	0		0	0	0	0	4	3	1
175	3	1	1	16	2.77259	40.259	1.60486	0.56	146.34	5.7	-0.253389	2.16536	0.75281	509.901	2.70749	1	1	1	1	1	1	1	1	1	1	1	1	1	1	1	1	0.551904	0.255708	0.333227	0.18503	0.331467	1.30414	0.940741	2.87615	6	8.05825	0.66813	0.955316	1.5617	0.673533	0.323015	4	3	2
176	3	1	1	4	1.38629	41.8859	1.62207	0.47	122.77	2.8	-0.330064	2.08909	0.446194	613.861	2.78807	0	0	0	1	0	0	0	0	0	0	1	0	0	0	1	1	0.574207	0.214612	0.279556	0.222754	0.322782	1.29309	0.932766	3.09528	3	2.19566	0.511355	0.869722	1.26229	0.53284	0.299224	4	4	1
178	3	1	0	4	1.38629	41.7427	1.62058	0.43	106.42	7.4	-0.367219	2.02703	0.868663	632.013	2.80073	1	0	0	1	1	0	0	1	0	0	0	0	0	0	0	0	0.572244	0.196347	0.242326	0.229341	0.310065	1.27982	0.923194	3.56029	2	0		0	0	0	0	4	1	1
179	3	1	0	16	2.77259	46.3744	1.66628	0.51	143.69	4.2	-0.293977	2.15742	0.620023	658.416	2.8185	1	1	1	1	1	1	1	1	1	1	1	1	1	1	1	1	0.635739	0.232877	0.327193	0.238922	0.358683	1.29141	0.931552	2.30218	6	7.5553	0.690933	0.910762	1.73076	0.942496	0.462263	4	3	1
180	3	1	1	16	2.77259	41.0215	1.61301	0.36	136.01	6.3	-0.447842	2.13357	0.796997	650.165	2.81302	1	1	1	1	1	1	1	1	1	1	1	1	1	1	1	1	0.562357	0.164384	0.309705	0.235928	0.318093	1.28166	0.924522	3.24355	6	11.4506	0.793233	0.927444	2.54369	1.05576	0.5632	4	4	1
181	3	1	1	4	1.38629	37.6437	1.57569	0.41	119.55	4.7	-0.389196	2.07755	0.66861	122.112	2.08676	0	0	1	0	0	0	0	0	0	1	1	1	0	0	0	0	0.516051	0.187215	0.272224	0.0443114	0.25495	1.1447	0.825724	32.8112	3	0.161821	0.820144	0.648932	1.8299	1.02893	0.624717	3	3	1
183	3	1	1	1	0	38.9498	1.59051	0.31	96.25	3.4	-0.502852	1.9834	0.537196	270.627	2.43237	0	0	0	0	0	0	0	0	0	0	0	0	1	0	0	0	0.533957	0.141553	0.219168	0.0982036	0.24822	1.17362	0.846585	-88.1402	1	0		0	0	0	0	3	1	1
184	4	0	0	16	2.77259	30.3844	1.48265	0.63	148.33	4.1	-0.199912	2.17123	0.610742	1438.94	3.15804	1	1	1	1	1	1	1	1	1	1	1	1	1	1	1	1	0.416535	0.287671	0.337758	0.522156	0.39103	1.36101	0.981762	2.04396	7	9.62351	0.769982	0.916967	2.51115	1.5597	0.720247	4	4	2
187	4	0	0	9	2.19722	31.6831	1.50083	0.63	154.2	3.7	-0.199126	2.18808	0.572435	712.871	2.85301	1	1	1	1	1	0	1	0	1	0	0	0	1	1	0	0	0.434339	0.287671	0.351125	0.258683	0.332954	1.3662	0.985502	2.96915	5	0.721096	0.842834	0.466882	1.22114	0.661444	0.374697	4	4	3
188	4	0	0	16	2.77259	40.6745	1.60932	0.43	103.38	4.3	-0.36381	2.01445	0.628873	980.198	2.99131	1	1	1	1	1	1	1	1	1	1	1	1	1	1	1	1	0.5576	0.196347	0.235404	0.355689	0.33626	1.30272	0.939712	2.75319	9	9.01068	0.778125	0.874092	2.5524	1.45088	0.70378	4	4	2
190	4	0	0	1	0	42.1533	1.62483	0.64	138.88	4.8	-0.195026	2.14263	0.684486	148.515	2.17177	0	0	0	0	0	0	0	0	0	0	1	0	0	0	0	0	0.577872	0.292237	0.31624	0.0538922	0.31006	1.18116	0.852027	3.4097	1	0		0	0	0	0	3	3	2
191	4	0	0	4	1.38629	35.7119	1.55281	0.83	226.26	3.1	-0.081087	2.35461	0.497977	394.389	2.59593	1	0	0	0	0	1	0	0	1	0	0	0	0	0	1	0	0.489568	0.378995	0.515211	0.143114	0.381722	1.29906	0.937071	2.06607	2				0.388397	0.252513	0.129452	4	3	3
192	4	0	0	1	0	40.8272	1.61095	0.33	61.41	2.9	-0.481115	1.7882	0.460968	9.90099	0.995679	0	0	0	0	0	1	0	0	0	0	0	0	0	0	0	0	0.559693	0.150685	0.139835	0.00359281	0.213451	0.902293	0.650867	-2.99192	1	0		0	0	0	0	3	1	1
193	4	0	1	4	1.38629	42.0756	1.62403	0.37	132.79	3.8	-0.425487	2.12317	0.584668	1145.21	3.05889	1	1	0	1	0	0	0	0	0	0	0	0	0	0	0	1	0.576808	0.16895	0.302373	0.415569	0.365925	1.29945	0.937356	2.23516	3				0.253393	0.140189	0.0611634	4	3	2
194	4	0	1	9	2.19722	37.1327	1.56976	0.67	170.82	5.5	-0.173515	2.23253	0.742039	468.647	2.67085	1	1	1	0	0	1	0	1	0	1	1	0	0	1	0	1	0.509046	0.305936	0.38897	0.17006	0.343503	1.31818	0.950867	2.63665	7	3.66227	0.802856	0.757081	2.08967	1.77009	0.810277	4	3	2
195	4	0	1	1	0	29.3575	1.46772	0.31	49.71	5	-0.511817	1.69644	0.701547	160.066	2.2043	0	0	0	0	0	0	0	0	1	0	0	0	0	0	0	0	0.402457	0.141553	0.113193	0.0580838	0.178822	1.1398	0.822195	-1.5391	1	0	0	0	0	0	0	2	1	0
196	4	0	1	1	0	37.3015	1.57173	0.61	98.5	5.1	-0.21466	1.99345	0.709817	59.4059	1.77383	0	0	1	0	0	0	0	0	0	0	0	0	0	0	0	0	0.51136	0.278539	0.224292	0.0215569	0.258937	1.11355	0.803255	18.4447	1	0		0	0	0	0	3	2	1
197	4	0	1	4	1.38629	47.9842	1.6811	0.66	135.86	4.9	-0.180704	2.13311	0.69007	308.581	2.48937	1	0	0	1	0	1	1	0	0	0	0	0	0	0	0	0	0.657808	0.30137	0.309363	0.111976	0.345129	1.22437	0.8832	2.42532	2				1.59412	0.540204	0.35503	3	3	1
198	4	0	0	4	1.38629	48.7875	1.68831	0.71	158.57	4.7	-0.150769	2.20021	0.67577	1183.17	3.07305	0	0	1	1	0	0	1	0	0	0	0	0	0	0	1	0	0.66882	0.324201	0.361076	0.429341	0.445859	1.34394	0.969444	1.65581	4	3.11513	0.463566	0.747813	1.80424	1.09196	0.585039	4	4	4
200	4	0	0	4	1.38629	43.1795	1.63528	0.37	88.32	3.5	-0.434192	1.94604	0.548376	110.561	2.0436	1	0	0	0	1	1	0	0	0	0	0	0	0	0	1	0	0.591941	0.16895	0.201111	0.0401198	0.25053	1.06225	0.766255	274.374	2				0.650419	0.311129	0.169922	3	1	1
201	4	0	0	16	2.77259	33.2883	1.52229	0.36	118.13	4.3	-0.438817	2.07237	0.638437	707.921	2.84998	1	1	1	1	1	1	1	1	1	1	1	1	1	1	1	1	0.456344	0.164384	0.268991	0.256886	0.286651	1.32043	0.952492	5.59843	9	7.14775	0.823117	0.866162	2.67089	1.39915	0.713546	4	3	1
202	4	0	0	1	0	34.3205	1.53555	0.69	166.51	5.5	-0.163642	2.22144	0.740138	151.815	2.18132	0	0	0	0	0	0	0	1	0	0	0	0	0	0	0	0	0.470494	0.315068	0.379156	0.0550898	0.304952	1.22019	0.880184	3.80611	1	0		0	0	0	0	3	3	2
203	4	0	1	4	1.38629	38.92	1.59017	0.72	131.13	4.7	-0.143499	2.11769	0.668503	1402.64	3.14695	1	0	0	1	0	0	0	1	0	0	0	1	0	0	0	0	0.533548	0.328767	0.298593	0.508982	0.417472	1.35445	0.977032	1.83039	1	0		0	0	0	0	4	4	3
204	4	0	1	1	0	34.1808	1.53378	0.6	91.1	4.4	-0.222708	1.95954	0.641697	552.805	2.74257	0	0	0	0	0	0	1	0	0	0	0	0	0	0	0	0	0.468578	0.273973	0.207441	0.200599	0.287648	1.32094	0.952858	5.45949	1	0		0	0	0	0	4	2	0
205	4	0	1	16	2.77259	35.6208	1.5517	0.95	303.74	4.6	-0.0227153	2.48251	0.660908	1202.97	3.08025	1	1	1	1	1	1	1	1	1	1	1	1	1	1	1	1	0.48832	0.43379	0.691639	0.436527	0.512569	1.36626	0.985547	1.44337	6	9.814	0.895722	0.881719	2.60228	1.34521	0.673646	4	4	3
206	4	0	1	4	1.38629	39.974	1.60178	0.61	140.45	4.7	-0.212695	2.14754	0.672529	1620.46	3.20964	1	0	0	0	0	0	1	0	0	0	0	0	0	1	1	0	0.547997	0.278539	0.319815	0.588024	0.433594	1.33621	0.963874	1.71324	1	0		0	0	0	0	4	4	2
207	4	0	1	4	1.38629	46.0953	1.66366	0.37	112.45	3.6	-0.435216	2.05097	0.558075	765.677	2.88405	0	0	0	1	0	0	1	0	0	0	0	0	0	1	0	1	0.631913	0.16895	0.256057	0.277844	0.333691	1.25907	0.908228	2.71014	3				2.2365	0.691241	0.498095	4	3	1
208	4	0	1	1	0	35.2283	1.54689	0.42	53.74	3.7	-0.380838	1.73032	0.571729	26.4026	1.42165	0	0	0	0	0	0	0	0	0	0	0	1	0	0	0	0	0.482938	0.191781	0.12237	0.00958084	0.201668	0.987407	0.712263	-2.34455	1	0		0	0	0	0	2	1	0
209	4	0	0	1	0	30.3245	1.48179	0.59	78.21	2.1	-0.228287	1.89324	0.315365	242.574	2.38484	0	0	1	0	0	0	0	0	0	0	0	0	0	0	0	0	0.415713	0.269406	0.17809	0.088024	0.237808	1.25298	0.903832	-13.3651	1	0		0	0	0	0	4	2	0
210	4	0	1	1	0	28.7484	1.45861	0.5	91.82	2.4	-0.299149	1.96294	0.373327	201.32	2.30389	1	0	0	0	0	0	0	0	0	0	0	0	0	0	0	0	0.394106	0.228311	0.209081	0.0730539	0.226138	1.25125	0.902585	-6.50603	1	0		0	0	0	0	3	2	0
211	4	0	0	4	1.38629	35.5857	1.55128	0.76	173.52	4.7	-0.120957	2.23935	0.670088	300.33	2.4776	0	0	0	0	1	0	0	1	1	0	0	0	1	0	0	0	0.487838	0.347032	0.395118	0.108982	0.334743	1.28214	0.924866	2.79028	2	0.262634	0.787289	0.834561	0.899363	0.95949	0.570239	4	3	3
212	4	0	1	1	0	35.1798	1.54629	0.41	58.34	4.8	-0.381388	1.76599	0.678723	67.6568	1.83031	0	0	0	0	0	0	0	0	0	0	1	0	0	0	0	0	0.482273	0.187215	0.132845	0.0245509	0.206721	1.04895	0.756655	-2.7793	1	0		0	0	0	0	3	1	0
213	4	0	1	16	2.77259	29.5904	1.47115	0.77	191.82	5.2	-0.113992	2.28289	0.713866	506.601	2.70467	1	1	1	1	1	1	1	1	1	1	1	1	1	1	1	1	0.405651	0.351598	0.436788	0.183832	0.344467	1.34144	0.967647	2.66159	4	11.663	0.779118	0.931631	2.56231	1.43839	0.659893	4	3	2
214	4	0	1	4	1.38629	33.0882	1.51967	0.44	152.74	2.2	-0.35705	2.18396	0.345378	1356.44	3.1324	1	0	0	0	1	1	0	0	0	0	0	0	0	0	1	0	0.453601	0.200913	0.3478	0.492216	0.373633	1.33672	0.964242	2.19765	2				1.617	0.655482	0.46281	4	3	1
215	4	0	1	4	1.38629	36.8805	1.5668	0.83	184.52	5.6	-0.0803054	2.26604	0.749684	1429.04	3.15505	0	1	0	0	0	0	0	1	1	0	0	0	1	0	0	0	0.505588	0.378995	0.420166	0.518563	0.455828	1.37803	0.994042	1.6519	4	1.83698	0.696903	0.904469	1.46375	0.951124	0.564398	4	4	3
216	4	0	0	4	1.38629	37.7881	1.57735	0.77	202.11	4.9	-0.115061	2.30559	0.688943	658.416	2.8185	0	0	0	0	0	0	1	1	0	0	1	0	0	0	1	0	0.518031	0.351598	0.46022	0.238922	0.392193	1.34745	0.971979	2.01753	4	2.55446	0.724723	0.832907	1.78294	1.17304	0.645975	4	4	3
218	4	0	1	4	1.38629	35.364	1.54856	0.49	111.12	4.7	-0.311951	2.04579	0.671899	2212.87	3.34496	0	0	0	0	0	0	1	0	0	0	0	1	1	0	1	0	0.484799	0.223744	0.253029	0.802994	0.441141	1.25358	0.904265	1.57122	2				0.180572	0.202273	0.0973044	4	3	1
219	4	0	1	1	0	31.9045	1.50385	0.62	121.36	3.5	-0.20443	2.08409	0.542506	377.888	2.57736	0	0	0	1	0	0	0	0	0	0	0	0	0	0	0	0	0.437373	0.283105	0.276346	0.137126	0.283487	1.31343	0.947436	6.05184	1	0		0	0	0	0	4	3	0
220	4	0	0	4	1.38629	30.3469	1.48211	0.76	166.93	4.5	-0.116721	2.22255	0.652032	216.172	2.3348	1	0	0	0	0	0	0	0	0	1	1	0	0	1	0	0	0.416021	0.347032	0.380112	0.0784431	0.305402	1.26391	0.911722	3.87186	3	0.139463	0.876563	0.47243	1.70599	0.900412	0.537984	3	3	2
221	4	0	0	4	1.38629	27.0991	1.43295	0.61	149.34	5.4	-0.213736	2.17418	0.734018	780.528	2.89239	0	0	0	1	0	0	1	0	0	0	0	0	0	1	0	1	0.371497	0.278539	0.340058	0.283234	0.318332	1.3788	0.994593	3.47639	4	1.6899	0.57222	0.900759	1.96027	0.922797	0.555708	4	4	2
222	4	0	0	16	2.77259	33.4776	1.52475	0.92	218.96	5.7	-0.0365868	2.34037	0.758323	843.234	2.92595	1	1	1	1	1	1	1	1	1	1	1	1	1	1	1	1	0.458939	0.420091	0.498588	0.305988	0.420902	1.37098	0.988953	1.82915	8	9.62351	0.793673	0.824694	2.61515	1.54321	0.74716	4	4	3
223	4	0	0	1	0	29.3078	1.46698	0.5	86.69	4.7	-0.298532	1.93796	0.676114	49.505	1.69465	1	0	0	0	0	0	0	0	0	0	0	0	0	0	0	0	0.401775	0.228311	0.1974	0.0179641	0.211362	1.12856	0.814083	-3.53536	1	0		0	0	0	0	3	2	0
225	4	0	1	1	0	39.2239	1.59355	0.54	111.7	5.2	-0.265803	2.04806	0.714262	556.106	2.74516	0	1	0	0	0	0	0	0	0	0	0	0	0	0	0	0	0.537715	0.246575	0.254349	0.201796	0.310109	1.30381	0.940503	3.63235	1	0		0	0	0	0	4	3	1
227	4	0	0	1	0	42.9276	1.63274	0.61	118.13	4.9	-0.216683	2.07235	0.69157	526.403	2.72132	0	0	0	0	0	0	1	0	0	0	0	0	0	0	0	0	0.588488	0.278539	0.268991	0.191018	0.331759	1.2908	0.931117	2.83021	1	0		0	0	0	0	4	4	2
228	4	0	0	1	0	35.0159	1.54427	0.58	111.84	4.3	-0.238629	2.04861	0.63228	186.469	2.27061	0	0	0	0	0	0	0	0	0	0	0	0	1	0	0	0	0.480028	0.26484	0.254668	0.0676647	0.2668	1.22203	0.881507	10.7216	1	0		0	0	0	0	3	3	0
229	4	0	0	1	0	31.8046	1.50249	0.38	78.31	3.9	-0.423265	1.89384	0.589367	16.5017	1.21753	0	0	0	0	1	0	0	0	0	0	0	0	0	0	0	0	0.436004	0.173516	0.178318	0.00598802	0.198456	1.03379	0.745724	-2.3103	0	0	0	0	0	0	0	3	1	0
231	4	0	0	1	0	38.8219	1.58908	0.87	143.77	6.2	-0.0584385	2.15767	0.795678	1239.27	3.09317	0	0	0	0	0	0	0	0	0	0	0	0	0	1	0	0	0.532203	0.39726	0.327375	0.449701	0.426635	1.37088	0.988878	1.79294	1	0		0	0	0	0	4	4	3
232	4	0	1	9	2.19722	40.7297	1.60991	0.96	226.04	5.5	-0.017081	2.35419	0.742898	917.492	2.9626	1	1	1	0	1	1	1	0	0	1	0	0	0	0	1	1	0.558357	0.438356	0.51471	0.332934	0.461089	1.36845	0.987127	1.61945	6	2.25345	0.526082	0.827118	1.49182	1.31839	0.684387	4	4	3
233	4	0	0	9	2.19722	48.6303	1.68691	0.83	287.05	7.5	-0.0782658	2.45796	0.876813	561.056	2.74901	1	1	0	0	0	0	1	1	1	1	1	0	0	1	0	1	0.666665	0.378995	0.653634	0.203593	0.475722	1.29501	0.934155	1.49248	5	4.33361	0.71651	0.836159	1.98939	1.47509	0.751486	4	4	3
234	4	0	1	16	2.77259	38.4172	1.58453	0.4	163.87	1.1	-0.401977	2.2145	0.0301249	1341.58	3.12762	1	1	1	1	1	1	1	1	1	1	1	1	1	1	1	1	0.526655	0.182648	0.373144	0.486826	0.392318	1.32141	0.953195	1.98765	6	6.68919	0.586352	0.980679	1.48587	0.680548	0.323425	4	3	2
235	4	0	0	1	0	51.3357	1.71042	0.71	123.35	5.9	-0.148189	2.09112	0.773026	666.667	2.82391	0	1	0	0	0	0	0	0	0	0	0	0	0	0	0	0	0.703753	0.324201	0.280877	0.241916	0.387687	1.28505	0.926965	1.95186	1	0		0	0	0	0	4	4	2
236	4	0	1	16	2.77259	31.5029	1.49835	0.49	146.92	5.5	-0.311374	2.16709	0.739781	1226.07	3.08852	1	1	1	1	1	1	1	1	1	1	1	1	1	1	1	1	0.431868	0.223744	0.334548	0.44491	0.358768	1.35368	0.976474	2.42328	5	11.1399	0.784278	0.96454	2.31801	1.17718	0.566812	4	4	1
237	4	0	1	1	0	35.0168	1.54428	0.47	44.04	6.1	-0.324469	1.64385	0.783902	34.6535	1.53975	0	0	0	0	1	0	0	0	0	0	0	0	0	0	0	0	0.480039	0.214612	0.100282	0.0125749	0.201877	0.98522	0.710686	-2.3505	0	0	0	0	0	0	0	2	2	0
238	4	0	1	4	1.38629	30.3269	1.48183	0.4	141.77	4.3	-0.395948	2.1516	0.628802	2231.02	3.3485	0	0	0	1	0	1	0	0	0	1	0	0	1	0	0	0	0.415747	0.182648	0.322821	0.809581	0.432699	1.24852	0.900614	1.60478	3	0.921903	0.34791	0.993928	0.780555	0.318714	0.161007	4	3	1
239	4	0	0	4	1.38629	33.8624	1.52972	0.53	176.17	4.7	-0.278661	2.24594	0.670814	392.739	2.5941	0	0	0	1	0	0	0	0	0	1	0	0	0	1	1	0	0.464214	0.242009	0.401152	0.142515	0.312472	1.2981	0.936378	3.54404	4	1.37511	0.820031	0.597477	2.10983	1.29976	0.705573	4	3	1
240	4	0	1	4	1.38629	36.3273	1.56023	0.55	87.7	5.4	-0.261942	1.943	0.733563	110.561	2.0436	0	0	1	0	0	0	0	0	0	1	1	1	0	0	0	0	0.498005	0.251142	0.199699	0.0401198	0.247242	1.1466	0.827095	-57.3206	3	0.36464	0.545969	0.90548	1.9148	0.873509	0.516071	3	2	0
241	4	0	1	1	0	37.7792	1.57725	0.28	38.98	4.8	-0.551711	1.59079	0.682425	103.96	2.01687	0	0	0	0	0	0	0	0	0	1	0	0	0	0	0	0	0.517909	0.127854	0.0887604	0.0377246	0.193062	0.961808	0.693798	-1.71984	1	0		0	0	0	0	2	1	1
242	4	0	0	4	1.38629	27.3993	1.43774	0.39	61.33	4.6	-0.404562	1.78766	0.666386	33.0033	1.51856	0	0	1	0	0	0	0	0	0	1	1	1	0	0	0	0	0.375613	0.178082	0.139653	0.011976	0.176331	1.07293	0.773958	-1.46764	3	0.668762	0.260325	0.907235	1.05518	0.593188	0.310322	3	1	0
244	4	0	0	4	1.38629	30.4327	1.48334	0.53	92.5	2.5	-0.272891	1.96613	0.405299	636.964	2.80411	0	1	0	0	0	0	0	1	1	0	0	0	1	0	0	0	0.417197	0.242009	0.210629	0.231138	0.275243	1.34483	0.97009	7.93146	4				0.579297	0.441803	0.270552	4	3	0
246	5	1	1	1	0	60.5469	1.78209	0.24	44.98	2.4	-0.612959	1.65301	0.372459	717.822	2.85602	0	0	0	0	0	0	0	0	0	0	0	0	1	0	0	0	0.830027	0.109589	0.102423	0.260479	0.32563	1.01724	0.733787	2.32786	1	0		0	0	0	0	3	2	1
247	5	1	1	4	1.38629	57.1645	1.75713	0.55	124.52	4.5	-0.259408	2.09522	0.653015	993.399	2.99712	0	0	0	1	0	0	1	0	0	0	0	0	0	1	0	1	0.783659	0.251142	0.283541	0.360479	0.419705	1.27054	0.916504	1.69434	2				0.537815	0.237378	0.119511	4	4	3
248	5	1	0	1	0	52.5872	1.72088	0.46	69.09	3.3	-0.340323	1.83942	0.522941	16.5017	1.21753	0	0	0	0	0	1	0	0	0	0	0	0	0	0	0	0	0.720909	0.210046	0.157323	0.00598802	0.273566	0.899103	0.648566	5.902	1	0		0	0	0	0	3	1	1
249	5	1	1	4	1.38629	65.1375	1.81383	0.44	167.39	1.7	-0.357857	2.22373	0.236554	603.96	2.78101	0	1	0	0	0	1	0	1	1	0	0	0	0	0	0	0	0.892959	0.200913	0.381159	0.219162	0.423548	1.19056	0.858811	1.56384	4	2.78373	0.339429	0.977748	0.947366	0.447062	0.224609	4	4	2
250	5	1	0	16	2.77259	57.181	1.75725	1.59	439.16	5.3	0.200345	2.64262	0.724428	785.479	2.89513	1	1	1	1	1	1	1	1	1	1	1	1	1	1	1	1	0.783885	0.726027	1	0.28503	0.698736	1.30727	0.942998	1.11404	5	7.5553	0.721834	0.810051	2.02676	1.13891	0.564282	4	4	3
251	5	1	1	1	0	63.5443	1.80308	0.89	198.35	4.4	-0.048886	2.29744	0.645788	839.934	2.92425	0	0	0	1	0	0	0	0	0	0	0	0	0	0	0	0	0.871118	0.406393	0.451658	0.30479	0.50849	1.30353	0.940298	1.38662	1	0		0	0	0	0	4	4	3
252	4	1	0	1	0	60.8104	1.78398	0.62	124.09	4	-0.209854	2.09375	0.599819	493.399	2.6932	0	0	0	1	0	0	0	0	0	0	0	0	0	0	0	0	0.83364	0.283105	0.282562	0.179042	0.394587	1.20022	0.865775	1.75736	1	0		0	0	0	0	4	3	1
253	5	1	1	16	2.77259	56.857	1.75478	0.81	182.92	3.1	-0.0913845	2.26227	0.497198	643.564	2.80859	1	1	1	1	1	1	1	1	1	1	1	1	1	1	1	1	0.779444	0.369863	0.416522	0.233533	0.44984	1.29132	0.931489	1.57497	4	8.05825	0.776517	0.95196	1.81698	0.667172	0.351801	4	4	3
254	5	1	0	1	0	60.4646	1.7815	0.74	167.34	3.8	-0.128294	2.22361	0.582082	1193.07	3.07667	0	0	0	0	0	0	0	0	0	0	0	0	0	1	0	0	0.828899	0.3379	0.381046	0.432934	0.495195	1.31569	0.949073	1.43594	1	0		0	0	0	0	4	4	2
255	5	1	0	4	1.38629	62.7734	1.79778	0.85	239.12	5.3	-0.068786	2.37862	0.726482	646.865	2.81081	0	0	0	0	0	0	0	1	0	0	1	1	0	1	0	0	0.86055	0.388128	0.544494	0.234731	0.506976	1.28285	0.925382	1.37666	3				2.26296	0.691241	0.498095	4	3	3
256	5	1	1	1	0	46.6318	1.66868	0.34	92.62	3.9	-0.470443	1.96673	0.588002	69.3069	1.84078	0	0	0	0	0	0	0	0	0	1	0	0	0	0	0	0	0.639268	0.155251	0.210903	0.0251497	0.257643	0.996646	0.718928	18.5424	1	0		0	0	0	0	3	1	1
257	5	1	0	1	0	53.7488	1.73037	0.38	68.77	3.4	-0.42464	1.83739	0.529275	47.8548	1.67993	1	0	0	0	0	0	0	0	0	0	0	0	0	0	0	0	0.736833	0.173516	0.156594	0.0173653	0.271077	0.901431	0.650245	6.32127	1	0		0	0	0	0	3	1	1
258	5	1	1	4	1.38629	62.8064	1.798	0.38	98.66	1.9	-0.41889	1.99413	0.270619	280.528	2.44798	0	0	0	0	0	0	0	1	0	0	0	1	0	0	1	1	0.861003	0.173516	0.224656	0.101796	0.340243	1.04356	0.752767	2.07619	4	2.9373	0.970548	0.824016	0.878653	0.562512	0.289452	3	2	1
259	5	1	1	4	1.38629	56.3842	1.75116	0	91.31	2.9	-3	1.9605	0.467818	1061.06	3.02574	1	0	0	1	0	0	0	0	0	0	0	0	1	0	0	1	0.772961	0	0.20792	0.38503	0.341478	0.965673	0.878994	2.15438	3				0.925599	0.334143	0.186632	3	2	2
260	5	1	1	1	0	51.4629	1.71149	0.27	32.31	4.7	-0.561733	1.50938	0.671531	4.9505	0.694649	0	0	0	0	0	0	0	0	1	0	0	0	0	0	0	0	0.705497	0.123288	0.0735723	0.00179641	0.226038	0.681774	0.491796	-3.452	1	0		0	0	0	0	2	1	1
261	5	1	0	1	0	47.929	1.6806	0.26	12.94	4.3	-0.583434	1.1118	0.630327	26.4026	1.42165	0	0	0	0	0	0	0	0	1	0	0	0	0	0	0	0	0.65705	0.118721	0.0294653	0.00958084	0.203704	0.626479	0.451909	-1.43919	1	0		0	0	0	0	2	1	1
262	5	1	1	1	0	56.5328	1.7523	0.29	63.71	4.7	-0.532171	1.80422	0.674407	752.475	2.87649	0	0	0	0	0	0	0	0	0	0	1	0	0	0	0	0	0.774999	0.13242	0.145072	0.273054	0.331386	1.1115	0.801781	2.41772	1	0		0	0	0	0	4	2	1
263	5	1	0	1	0	55.7185	1.746	0.4	62.42	4.3	-0.398523	1.7953	0.629433	2117.16	3.32575	0	0	0	0	0	0	1	0	0	0	0	0	0	0	0	0	0.763836	0.182648	0.142135	0.768263	0.464221	1.15536	0.833418	1.39572	1	0		0	0	0	0	4	2	2
265	5	1	1	1	0	58.1459	1.76452	0.27	56.55	2.6	-0.561733	1.75242	0.407043	485.149	2.68587	0	0	0	0	0	0	1	0	0	0	0	0	0	0	0	0	0.797112	0.123288	0.128769	0.176048	0.306304	1.02629	0.740309	2.91004	1	0		0	0	0	0	4	1	1
266	5	1	0	1	0	61.5673	1.78935	0.46	78.7	4.9	-0.339293	1.89596	0.690731	506.601	2.70467	0	0	0	0	0	0	0	1	0	0	0	0	0	0	0	0	0.844017	0.210046	0.179206	0.183832	0.354275	1.11804	0.806492	2.00615	1	0		0	0	0	0	4	1	1
267	5	1	1	16	2.77259	55.9497	1.7478	0.71	213.69	4.8	-0.151124	2.32978	0.679396	707.921	2.84998	1	1	1	1	1	1	1	1	1	1	1	1	1	1	1	1	0.767006	0.324201	0.486588	0.256886	0.45867	1.29815	0.936419	1.54756	7	8.05825	0.494791	0.971473	2.21487	0.854	0.448719	4	4	3
268	5	1	0	4	1.38629	48.2094	1.68313	0.54	115.91	3.3	-0.270637	2.06413	0.515583	1476.9	3.16935	0	1	0	0	0	0	0	1	1	0	0	0	1	0	0	0	0.660895	0.246575	0.263936	0.535928	0.426834	1.29917	0.937153	1.70622	4	0.293019	0.46211	0.936912	0.866204	0.706257	0.404898	4	3	2
269	5	1	0	4	1.38629	51.3221	1.7103	0.35	50.37	4.1	-0.452973	1.70214	0.618101	61.0561	1.78573	0	0	1	0	0	0	0	0	0	1	1	1	0	0	0	0	0.703566	0.159817	0.114696	0.0221557	0.250059	0.873237	0.629907	1979.19	2				1.10672	0.500402	0.32	2	1	1
270	5	1	0	16	2.77259	53.8002	1.73078	0.31	63.02	4	-0.502715	1.79948	0.597782	498.35	2.69753	1	1	1	1	1	1	1	1	1	1	1	1	1	1	1	1	0.737538	0.141553	0.143501	0.180838	0.300857	1.0902	0.786416	3.39421	6	6.53715	0.555051	0.971856	1.4286	0.669433	0.309866	4	1	1
271	5	1	1	1	0	55.2881	1.74263	0.37	11.56	3.3	-0.436511	1.0629	0.521953	28.0528	1.44798	0	0	0	0	1	0	0	0	0	0	0	0	0	0	0	0	0.757936	0.16895	0.026323	0.0101796	0.240847	0.640443	0.461982	-9.19477	0	0	0	0	0	0	0	2	2	1
272	5	1	0	16	2.77259	50.1478	1.70025	0.78	241	3.9	-0.109444	2.38202	0.589451	1559.41	3.19296	1	1	1	1	1	1	1	1	1	1	1	1	1	1	1	1	0.687469	0.356164	0.548775	0.565868	0.539569	1.3609	0.981682	1.375	10	9.94049	0.724016	0.763063	2.40107	1.82059	0.812585	4	4	4
273	5	1	1	1	0	47.8516	1.6799	0.29	75.51	3	-0.530943	1.87801	0.477421	457.096	2.66001	0	0	0	0	0	0	0	0	0	0	0	0	0	0	0	1	0.655989	0.13242	0.171942	0.165868	0.281555	1.13555	0.819126	5.37061	1	0		0	0	0	0	4	1	1
275	5	1	1	16	2.77259	56.6107	1.7529	0.71	286.1	4.7	-0.147449	2.45652	0.676338	970.297	2.9869	1	1	1	1	1	1	1	1	1	1	1	1	1	1	1	1	0.776067	0.324201	0.651471	0.352096	0.525959	1.31825	0.950917	1.36518	8	11.4506	0.756539	0.839678	2.53229	1.66091	0.778592	4	4	4
276	5	1	1	1	0	49.3468	1.69326	0.39	38.54	3.6	-0.404908	1.58595	0.561987	21.4521	1.33147	1	0	0	0	0	0	0	0	0	0	0	0	0	0	0	0	0.676487	0.178082	0.0877584	0.00778443	0.237528	0.81505	0.587935	-8.5572	0	0	0	0	0	0	0	2	2	1
277	5	1	0	1	0	58.0986	1.76417	0.83	188.73	4.2	-0.0809375	2.27584	0.62668	608.911	2.78455	0	0	0	0	0	0	0	0	0	0	0	0	0	0	0	1	0.796464	0.378995	0.429752	0.220958	0.456542	1.28426	0.926395	1.53997	1	0		0	0	0	0	4	3	3
279	5	1	0	1	0	52.2177	1.71782	0.26	40.92	4.4	-0.585984	1.61191	0.643941	66.0066	1.81959	0	0	1	0	0	0	0	0	0	0	0	0	0	0	0	0	0.715844	0.118721	0.0931779	0.0239521	0.237924	0.794047	0.572784	-8.04731	1	0		0	0	0	0	2	1	1
281	5	1	0	4	1.38629	59.6706	1.77576	1.03	318.1	4.1	0.0138184	2.50257	0.609339	1100.66	3.04165	0	0	0	0	1	0	0	0	0	0	0	1	1	0	0	1	0.818015	0.47032	0.724337	0.399401	0.603018	1.34451	0.969861	1.2459	4	4.40943	0.601833	0.904376	1.56412	1.00815	0.541646	4	4	4
282	5	1	1	9	2.19722	57.231	1.75763	0	345.54	3.9	-3	2.5385	0.591621	953.795	2.97946	1	1	0	1	1	0	1	0	0	1	0	1	1	0	0	1	0.784571	0	0.78682	0.346108	0.479375	1.04018	0.946816	1.32005	4				0.523279	0.374028	0.216639	3	3	3
283	5	1	0	16	2.77259	55.5533	1.74471	1.04	281.86	3.5	0.0166516	2.45004	0.540465	1267.33	3.10289	1	1	1	1	1	1	1	1	1	1	1	1	1	1	1	1	0.761571	0.474886	0.641816	0.45988	0.584538	1.36383	0.983798	1.2906	10	7.5553	0.680487	0.918591	2.33145	1.12362	0.557662	4	4	4
285	5	1	1	1	0	49.8757	1.69789	0.44	75.63	3.1	-0.353021	1.87869	0.484481	41.2541	1.61547	0	0	0	0	0	0	0	0	0	0	0	1	0	0	0	0	0.683737	0.200913	0.172215	0.0149701	0.267959	0.954037	0.688192	7.93659	1	0		0	0	0	0	3	2	1
286	5	1	1	4	1.38629	62.564	1.79632	0.75	166.21	3.8	-0.124477	2.22064	0.581826	874.587	2.9418	1	1	0	1	0	0	0	0	0	1	0	0	0	0	0	0	0.857679	0.342466	0.378473	0.317365	0.473996	1.28881	0.929678	1.47041	3	2.04803	0.157952	0.987094	0.385698	0.21874	0.0970347	4	4	4
287	5	1	1	4	1.38629	46.1948	1.66459	0.7	203.22	3.3	-0.152304	2.30796	0.519406	1009.9	3.00428	0	1	0	0	0	0	0	1	1	0	0	0	1	0	0	0	0.633277	0.319635	0.462747	0.366467	0.445532	1.35123	0.974706	1.66757	4	2.45203	0.615584	0.918102	1.36921	0.903289	0.526235	4	4	4
288	5	1	0	4	1.38629	52.6455	1.72136	0.51	85.55	3.3	-0.290654	1.9322	0.516228	556.106	2.74516	0	0	0	0	1	0	1	0	0	0	1	0	1	0	0	0	0.721709	0.232877	0.194804	0.201796	0.337796	1.2012	0.866482	2.46975	4				1.63653	0.675011	0.481974	4	2	1
290	5	1	1	4	1.38629	54.2284	1.73423	0.77	168.12	4.4	-0.113279	2.22561	0.643495	486.799	2.68735	1	0	0	1	1	0	0	0	0	1	0	0	0	0	0	0	0.743408	0.351598	0.382822	0.176647	0.413619	1.26612	0.91331	1.73922	1	3.46461	0.168874	0.974322	0.599021	0.315901	0.140561	4	3	3
291	5	1	0	4	1.38629	62.0574	1.79279	0.92	242.25	3.8	-0.0347921	2.38427	0.582354	574.257	2.75911	0	0	1	1	0	0	0	0	0	0	0	0	1	0	1	0	0.850735	0.420091	0.551621	0.208383	0.507708	1.27809	0.921944	1.37397	4	3.29969	0.935348	0.52712	1.97088	1.27531	0.695782	4	3	3
292	5	1	1	4	1.38629	53.5863	1.72905	0.5	103.31	3.8	-0.295924	2.01416	0.584423	415.842	2.61893	0	0	0	0	0	0	1	0	1	0	1	0	0	0	1	0	0.734605	0.228311	0.235245	0.150898	0.337265	1.1812	0.852058	2.4423	3	1.55036	0.659213	0.551261	1.36106	0.960213	0.581562	4	3	1
294	5	1	1	9	2.19722	57.7673	1.76168	0.64	142.61	1.4	-0.194318	2.15414	0.15975	963.696	2.98394	1	0	0	1	0	1	1	1	1	1	0	1	1	0	0	0	0.791923	0.292237	0.324734	0.349701	0.439649	1.29062	0.930985	1.6134	4	0.753213	0.353577	0.991013	0.911971	0.368006	0.188585	4	4	3
295	5	1	0	1	0	69.0946	1.83944	0.42	78.61	3.3	-0.374453	1.89548	0.516228	49.505	1.69465	0	0	0	0	0	0	0	0	0	0	0	1	0	0	0	0	0.947206	0.191781	0.179001	0.0179641	0.333988	0.849719	0.612943	1.82352	1	0		0	0	0	0	3	1	1
296	5	1	1	4	1.38629	52.7638	1.72234	0.53	96.51	3.2	-0.275222	1.98458	0.510826	1216.17	3.08499	1	0	0	0	1	1	0	0	0	0	0	0	0	0	1	0	0.72333	0.242009	0.21976	0.441317	0.406604	1.26823	0.914835	1.78678	2	0.855618	0.813692	0.993913	1.3862	0.65735	0.434707	4	3	3
297	5	1	0	4	1.38629	58.5775	1.76773	0.83	193.7	3.2	-0.0782593	2.28712	0.506825	330.033	2.51856	0	1	1	0	0	0	0	1	0	0	0	1	0	0	0	0	0.80303	0.378995	0.441069	0.11976	0.435714	1.22057	0.880452	1.5758	4	3.47194	0.91432	0.682277	1.55829	1.08449	0.609006	3	3	3
298	5	1	1	4	1.38629	61.6358	1.78983	0.54	127.93	3.5	-0.270821	2.10696	0.541968	315.182	2.49856	0	0	1	0	0	0	0	0	0	1	1	1	0	0	0	0	0.844954	0.246575	0.291306	0.114371	0.374302	1.13487	0.818636	1.83893	2	0.161821	0.57728	0.766909	1.56438	0.768858	0.486667	4	3	2
299	5	1	0	9	2.19722	60.4841	1.78164	1.04	205.95	3.3	0.0158148	2.31376	0.524535	831.683	2.91996	1	1	1	1	1	0	1	0	1	0	0	1	0	0	0	1	0.829166	0.474886	0.468963	0.301796	0.518703	1.32059	0.952606	1.38151	4				1.43872	0.500402	0.32	4	4	3
300	5	1	0	9	2.19722	54.6447	1.73755	0.4	137.72	3.6	-0.40191	2.13899	0.557343	1808.58	3.25734	1	1	0	0	1	0	0	0	1	0	1	1	1	0	1	1	0.749115	0.182648	0.313599	0.656287	0.475412	1.25639	0.906297	1.45378	5	1.59005	0.790823	0.743601	1.43613	1.03149	0.62671	4	3	2
301	5	1	1	16	2.77259	55.4875	1.7442	0.37	108.4	3.4	-0.43289	2.03502	0.527373	1765.68	3.24691	1	1	1	1	1	1	1	1	1	1	1	1	1	1	1	1	0.760669	0.16895	0.246835	0.640719	0.454293	1.22411	0.883011	1.49737	6	10.0574	0.817656	0.935687	2.14933	1.06673	0.519715	4	4	2
302	5	1	0	4	1.38629	54.8322	1.73904	0.63	107.04	3.3	-0.203232	2.02953	0.521159	240.924	2.38188	1	0	0	0	1	1	0	0	0	0	0	0	0	0	1	0	0.751686	0.287671	0.243738	0.0874251	0.34263	1.13977	0.822172	2.29121	3	1.05309	0.374981	0.922162	0.707684	0.415218	0.211457	3	2	1
303	5	1	0	4	1.38629	59.5329	1.77476	0.62	124.56	4.2	-0.207503	2.09537	0.62074	2755.78	3.44024	0	0	0	1	0	0	1	0	0	0	0	0	0	1	0	1	0.816126	0.283105	0.283632	1	0.595716	1.23781	0.892891	1.16879	3	1.8586	0.65044	0.765813	1.66226	1.23506	0.676978	4	4	2
304	5	1	0	1	0	54.7047	1.73802	0.63	113.91	3.3	-0.199686	2.05655	0.516937	676.568	2.83031	0	0	0	0	0	0	0	0	0	1	0	0	0	0	0	0	0.749938	0.287671	0.259382	0.245509	0.385625	1.25613	0.906103	1.91991	1	0		0	0	0	0	4	2	1
305	6	1	0	4	1.38629	53.7322	1.73023	0.65	119.33	3.9	-0.184955	2.07674	0.590699	554.455	2.74387	0	0	0	0	0	0	0	0	0	1	1	1	0	1	0	0	0.736606	0.296804	0.271723	0.201198	0.376583	1.24772	0.900038	1.99821	3	2.02536	0.963275	0.826267	1.72628	0.997272	0.595	4	2	1
306	6	0	0	16	2.77259	58.7315	1.76887	0.67	148.13	5.3	-0.176186	2.17063	0.723142	623.762	2.79502	1	1	1	1	1	1	1	1	1	1	1	1	1	1	1	1	0.805141	0.305936	0.337303	0.226347	0.418682	1.25589	0.905934	1.67954	4	6.42665	0.530757	0.974385	1.73037	0.673043	0.353327	4	4	2
307	6	0	1	16	2.77259	52.8508	1.72305	0.6	93	4.3	-0.223544	1.96846	0.632058	866.337	2.93769	1	1	1	1	1	1	1	1	1	1	1	1	1	1	1	1	0.724522	0.273973	0.211768	0.314371	0.381159	1.26176	0.910165	1.97636	6	9.814	0.794189	0.850233	2.41696	1.06684	0.595222	4	3	1
309	6	0	0	4	1.38629	55.0242	1.74055	0.47	91.86	2.6	-0.32569	1.96314	0.417403	158.416	2.1998	1	0	0	0	0	0	0	0	1	0	0	1	0	0	1	0	0.754317	0.214612	0.209172	0.057485	0.308897	1.04872	0.756494	2.97012	3	2.55319	0.474114	0.982884	1.42746	0.64418	0.369822	3	2	1
310	6	0	1	1	0	52.2168	1.71781	0.31	65.16	3.8	-0.504017	1.81397	0.583486	28.0528	1.44798	0	0	0	0	0	0	0	0	1	0	0	0	0	0	0	0	0.715832	0.141553	0.148374	0.0101796	0.253985	0.848398	0.61199	29.493	1	0		0	0	0	0	3	1	1
311	6	0	1	16	2.77259	48.8787	1.68912	0.79	213.12	3.9	-0.102054	2.32863	0.589773	630.363	2.79959	1	1	1	1	1	1	1	1	1	1	1	1	1	1	1	1	0.67007	0.360731	0.48529	0.228743	0.436208	1.31569	0.949072	1.6755	7	9.814	0.581275	0.921967	2.5407	1.52238	0.763889	4	3	3
312	6	0	0	9	2.19722	54.9586	1.74004	0.76	198.03	6.8	-0.117778	2.29673	0.832249	1207.92	3.08204	1	0	0	1	1	0	0	0	1	1	1	1	0	1	0	1	0.753418	0.347032	0.450929	0.438323	0.497426	1.34198	0.968037	1.46017	2	4.7429	0.769734	0.946187	2.35284	0.784906	0.476676	4	4	4
313	6	0	0	4	1.38629	39.8437	1.60036	0.31	86.58	2.7	-0.503058	1.93744	0.438401	90.7591	1.95789	1	0	0	0	1	1	0	0	0	0	0	0	0	0	1	0	0.546211	0.141553	0.197149	0.0329341	0.229462	1.04694	0.755206	-6.42013	2	1.05045	0.728958	0.992489	1.54909	0.643621	0.418514	3	1	1
314	6	0	0	1	0	51.3195	1.71028	0.43	84.07	4.1	-0.368913	1.92462	0.60811	61.0561	1.78573	0	0	0	0	0	0	0	0	0	0	0	0	0	0	1	0	0.70353	0.196347	0.191434	0.0221557	0.278367	0.976751	0.704577	5.29647	1	0		0	0	0	0	3	2	1
315	6	0	0	4	1.38629	57.1181	1.75677	0.44	84.74	5.4	-0.355911	1.9281	0.733651	341.584	2.5335	0	0	0	1	0	0	1	0	0	0	0	0	0	1	0	1	0.783022	0.200913	0.192959	0.123952	0.325212	1.10111	0.794282	2.51974	4	1.6899	0.637456	0.957668	1.57772	0.679377	0.390865	4	2	1
316	6	0	1	1	0	62.2115	1.79387	0.48	65.34	4.8	-0.318738	1.8152	0.677413	105.611	2.02371	0	0	1	0	0	0	0	0	0	0	0	0	0	0	0	0	0.852848	0.219178	0.148784	0.0383234	0.314783	0.92686	0.668588	2.41025	1	0		0	0	0	0	3	2	1
317	6	0	1	4	1.38629	51.56	1.71231	0.33	46.52	3.7	-0.476799	1.66759	0.563736	834.983	2.92168	0	0	1	1	0	0	0	0	0	1	0	0	0	0	0	1	0.706827	0.150685	0.10593	0.302994	0.316609	1.12849	0.814037	2.89998	3				0.0412915	0.0345508	0.0111108	3	2	1
318	6	0	1	1	0	72.9457	1.863	0.74	323.43	5.1	-0.128931	2.50978	0.710609	123.762	2.09259	0	0	0	0	0	0	0	0	0	1	0	0	0	0	0	0	1	0.3379	0.736474	0.0449102	0.529821	1.09613	0.790689	1.19422	1	0		0	0	0	0	3	3	3
319	6	0	1	4	1.38629	54.4202	1.73576	0.42	77.2	3.5	-0.370834	1.88759	0.54747	546.205	2.73736	0	0	0	0	1	0	0	0	0	0	1	1	1	0	0	0	0.746037	0.191781	0.17579	0.198204	0.327953	1.15696	0.834567	2.58487	2				1.09427	0.50664	0.325413	4	1	1
321	6	0	1	16	2.77259	48.1634	1.68272	0.32	48.95	2.8	-0.48875	1.68974	0.453532	935.644	2.97111	1	1	1	1	1	1	1	1	1	1	1	1	1	1	1	1	0.660265	0.146119	0.111463	0.339521	0.314342	1.1567	0.834383	3.07775	7	5.97827	0.785635	0.908012	1.62874	0.792645	0.377175	3	2	1
322	6	0	0	1	0	48.5203	1.68592	0.58	171.28	3	-0.232291	2.23371	0.473674	66.0066	1.81959	0	0	0	0	0	0	0	0	0	1	0	0	0	0	0	0	0.665156	0.26484	0.390017	0.0239521	0.335991	1.09899	0.79275	2.46817	1	0		0	0	0	0	3	3	2
323	6	0	0	1	0	52.069	1.71658	0.7	128.18	3.1	-0.153276	2.10783	0.494272	509.901	2.70749	0	0	0	0	0	0	1	0	0	0	0	0	0	0	0	0	0.713805	0.319635	0.291875	0.18503	0.377586	1.25773	0.907262	2.01095	1	0		0	0	0	0	4	4	2
325	6	0	0	4	1.38629	51.0059	1.70762	0.43	157.81	3.9	-0.367862	2.19813	0.595103	297.03	2.4728	0	1	1	0	0	1	0	0	0	0	0	0	0	0	1	0	0.699231	0.196347	0.359345	0.107784	0.340677	1.17369	0.84664	2.40509	4	2.58643	0.63302	0.849583	2.01359	1.10349	0.621537	4	3	2
326	6	0	1	4	1.38629	54.5758	1.737	0.15	18.2	4.2	-0.832742	1.26012	0.620089	1264.03	3.10176	1	1	0	0	0	0	1	0	0	0	0	1	0	0	0	0	0.748171	0.0684932	0.0414428	0.458683	0.329197	0.951174	0.686127	2.29507	2				1.05646	0.587385	0.398023	2	2	2
328	6	0	1	4	1.38629	45.2632	1.65574	1.02	367.18	8.8	0.00865534	2.56487	0.942423	1851.49	3.26752	0	0	0	1	0	0	0	1	0	0	1	0	1	0	0	0	0.620505	0.465753	0.836096	0.671856	0.648553	1.36531	0.98486	1.20355	4	9.814	0.979053	0.889664	2.7304	1.26889	0.690255	4	4	4
329	6	0	0	1	0	49.1878	1.69186	0.29	51.54	4.4	-0.529849	1.7121	0.642361	13.2013	1.12062	0	0	0	0	0	1	0	0	0	0	0	0	0	0	0	0	0.674307	0.13242	0.11736	0.00479042	0.23222	0.798758	0.576182	-5.7035	1	0		0	0	0	0	3	1	1
330	6	0	0	1	0	46.5752	1.66815	0.62	122.06	5.8	-0.208669	2.08658	0.76419	47.8548	1.67993	0	0	1	0	0	0	0	0	0	0	0	0	0	0	0	0	0.638491	0.283105	0.27794	0.0173653	0.304225	1.07556	0.775854	3.46841	1	0		0	0	0	0	3	3	2
331	6	0	0	1	0	49.2012	1.69198	0.4	147.49	5.5	-0.39682	2.16876	0.739253	504.95	2.70325	0	0	0	0	0	0	0	0	0	0	0	0	0	0	0	1	0.674491	0.182648	0.335846	0.183234	0.344055	1.2302	0.887399	2.43224	1	0		0	0	0	0	4	4	1
332	6	0	0	4	1.38629	58.0153	1.76354	0.59	91.06	4.3	-0.231002	1.95934	0.635113	615.512	2.78924	0	1	0	1	0	1	0	0	0	1	0	0	0	0	0	0	0.795322	0.269406	0.20735	0.223353	0.373858	1.20253	0.867439	1.94135	3				1.61522	0.514653	0.33241	4	3	1
333	6	0	1	1	0	49.5506	1.69505	0.4	73.96	3	-0.395294	1.86902	0.475233	334.983	2.52502	0	0	0	0	0	0	0	0	0	0	0	0	1	0	0	0	0.679281	0.182648	0.168412	0.121557	0.287975	1.12187	0.809262	4.50899	1	0		0	0	0	0	3	1	1
334	6	0	0	4	1.38629	51.6898	1.7134	0.61	153.68	4.1	-0.21635	2.18663	0.607865	546.205	2.73736	0	1	0	0	1	0	0	0	1	1	0	0	0	0	0	0	0.708607	0.278539	0.349941	0.198204	0.383823	1.26786	0.91457	1.96595	3	0.434473	0.628906	0.648309	1.41617	0.864649	0.532699	4	4	3
335	6	0	1	9	2.19722	48.7854	1.68829	0.53	153.8	5.3	-0.272025	2.18697	0.722629	1212.87	3.08381	0	1	1	1	0	0	1	1	0	0	1	0	0	1	1	1	0.668791	0.242009	0.350214	0.44012	0.425283	1.31963	0.95191	1.73691	5	7.99296	0.688987	0.778112	2.28232	1.66269	0.782031	4	4	2
336	6	0	0	1	0	43.7388	1.64087	0.37	77.12	4.7	-0.425208	1.88715	0.668222	26.4026	1.42165	0	0	0	0	0	0	0	0	1	0	0	0	0	0	0	0	0.599608	0.16895	0.175608	0.00958084	0.238437	0.956167	0.689728	-11.1218	1	0		0	0	0	0	3	1	1
337	6	0	0	4	1.38629	47.7766	1.67921	0.55	93.45	4	-0.257603	1.97057	0.606367	57.7558	1.7616	0	0	1	0	1	0	0	0	0	1	0	1	0	0	0	0	0.654961	0.251142	0.212793	0.0209581	0.284963	1.03845	0.74908	4.77692	3	2.83198	0.745807	0.76892	1.38583	1.07842	0.580868	3	2	1
338	6	0	1	1	0	47.1968	1.67391	0.35	72.56	3.1	-0.460286	1.86068	0.486476	14.8515	1.17177	0	0	0	0	0	0	0	0	0	0	0	0	0	0	1	0	0.647014	0.159817	0.165225	0.00538922	0.244361	0.898355	0.648026	-21.9493	1	0		0	0	0	0	3	1	1
339	6	0	0	1	0	50.8254	1.70608	0.63	145.64	5.1	-0.196562	2.16327	0.705001	249.175	2.3965	1	0	0	0	0	0	0	0	0	0	0	0	0	0	0	0	0.696757	0.287671	0.331633	0.0904192	0.35162	1.18967	0.858164	2.25956	1	0		0	0	0	0	4	3	2
340	6	0	1	4	1.38629	49.752	1.69681	0.51	114.72	3	-0.293977	2.05964	0.474279	749.175	2.87458	0	1	0	0	0	0	0	1	1	0	0	0	1	0	0	0	0.682041	0.232877	0.261226	0.271856	0.362	1.2715	0.917191	2.21233	4	1.83698	0.748625	0.705828	1.14346	0.890199	0.557311	4	4	1
342	6	0	1	1	0	52.3637	1.71903	0	41.52	0.2	-3	1.61827	-0.611929	31.3531	1.49628	0	0	0	0	0	1	0	0	0	0	0	0	0	0	0	0	0.717846	0	0.0945441	0.0113772	0.205942	0.427537	0.389161	-1.06232	1	0		0	0	0	0	1	1	1
343	6	0	0	1	0	57.988	1.76334	0.41	165.63	3.3	-0.382031	2.21915	0.521102	516.502	2.71307	0	0	0	1	0	0	0	0	0	0	0	0	0	0	0	0	0.794948	0.187215	0.377152	0.187425	0.386685	1.19755	0.863848	1.83056	1	0		0	0	0	0	4	4	2
344	6	0	0	16	2.77259	59.9199	1.77757	0.78	303.05	5.1	-0.105409	2.48151	0.705494	940.594	2.9734	1	1	1	1	1	1	1	1	1	1	1	1	1	1	1	1	0.821432	0.356164	0.690067	0.341317	0.552245	1.31411	0.947931	1.30506	7	6.42665	0.798892	0.949566	2.64682	1.22691	0.63867	4	4	4
345	6	0	0	1	0	51.2253	1.70948	0.34	161.86	1.5	-0.468542	2.20915	0.188352	366.337	2.56388	0	0	0	0	0	0	0	0	0	0	0	0	0	1	0	0	0.702239	0.155251	0.368567	0.132934	0.339748	1.17028	0.84418	2.4107	1	0		0	0	0	0	4	2	2
346	6	0	0	4	1.38629	47.3553	1.67537	0.35	108.73	3.7	-0.460692	2.03636	0.56705	285.479	2.45557	0	0	1	0	0	1	1	0	1	0	0	0	0	0	0	0	0.649186	0.159817	0.247586	0.103593	0.290046	1.14328	0.824702	4.45008	4	0.401264	0.155504	0.828235	0.585025	0.448439	0.217628	4	2	1
347	6	0	0	1	0	49.0746	1.69086	0.24	59.41	3	-0.619618	1.77383	0.478553	196.37	2.29307	0	0	0	0	0	0	0	0	0	0	0	1	0	0	0	0	0.672756	0.109589	0.135281	0.0712575	0.247221	0.967506	0.697908	-44.566	1	0		0	0	0	0	3	1	1
348	6	0	1	4	1.38629	53.3061	1.72678	0.57	182.04	5.5	-0.246135	2.26017	0.742467	782.178	2.89331	0	0	0	1	0	0	1	0	0	0	0	0	0	1	0	1	0.730765	0.260274	0.414519	0.283832	0.422347	1.29508	0.934205	1.71716	1				0.0493403	0.0342305	0.0109887	4	4	2
349	6	0	1	1	0	47.1967	1.67391	0.61	124.05	4.6	-0.216145	2.09361	0.663339	511.551	2.70889	0	0	0	0	0	0	0	0	0	0	0	0	0	1	0	0	0.647012	0.278539	0.282471	0.185629	0.348413	1.27006	0.916152	2.4276	1	0		0	0	0	0	4	3	1
350	6	0	1	4	1.38629	49.0548	1.69068	0.54	68.25	3.5	-0.267772	1.83409	0.539409	196.37	2.29307	0	0	1	0	0	0	0	0	0	1	1	1	0	0	0	0	0.672484	0.246575	0.15541	0.0712575	0.286432	1.08705	0.784143	4.61434	3	0.36464	0.924127	0.876664	2.2315	1.01129	0.615243	3	2	1
351	6	0	1	4	1.38629	47.6853	1.67838	0.33	130.86	3.6	-0.485118	2.11682	0.555697	1056.11	3.02371	1	0	0	0	1	1	0	0	0	0	0	0	0	0	1	0	0.65371	0.150685	0.297978	0.383234	0.371402	1.2651	0.912577	2.10879	2				1.21517	0.532096	0.3478	4	3	1
352	6	0	1	1	0	39.5404	1.59704	0.47	101.33	3.4	-0.331523	2.00573	0.535709	287.129	2.45808	0	0	0	0	0	0	0	1	0	0	0	0	0	0	0	0	0.542052	0.214612	0.230736	0.104192	0.272898	1.22013	0.880139	7.8775	1	0		0	0	0	0	3	2	1
353	6	0	1	4	1.38629	55.019	1.74051	0.34	85.85	3.5	-0.473135	1.93377	0.542007	1023.1	3.00992	0	0	0	1	0	0	0	1	0	0	0	1	1	0	0	0	0.754246	0.155251	0.195487	0.371257	0.36906	1.19483	0.861888	2.00591	3	3.12481	0.487186	0.980238	1.16078	0.487288	0.252143	4	2	1
354	6	0	1	16	2.77259	53.6439	1.72952	0.53	176.28	5.3	-0.274774	2.2462	0.7226	915.842	2.96182	1	1	1	1	1	1	1	1	1	1	1	1	1	1	1	1	0.735396	0.242009	0.401403	0.332335	0.427786	1.29799	0.936299	1.69046	6	9.814	0.91971	0.879654	2.61042	1.61469	0.765832	4	4	2
355	6	0	0	16	2.77259	47.9382	1.68068	0.45	190.15	5.5	-0.350171	2.27909	0.73909	973.597	2.98838	1	1	1	1	1	1	1	1	1	1	1	1	1	1	1	1	0.657177	0.205479	0.432986	0.353293	0.412234	1.30735	0.943054	1.80607	6	11.4864	0.873479	0.856121	2.64131	1.80199	0.789498	4	4	3
357	6	0	1	9	2.19722	50.1699	1.70044	0.38	112.99	4.5	-0.421843	2.05304	0.654699	229.373	2.36054	1	0	1	0	1	0	1	0	1	1	1	0	0	1	0	1	0.687771	0.173516	0.257287	0.0832335	0.300452	1.11372	0.80338	3.57922	4	5.44524	0.854552	0.498208	1.78007	1.2437	0.64817	3	2	1
358	6	0	0	16	2.77259	59.1764	1.77215	0.47	171.42	4.6	-0.324811	2.23406	0.664885	834.983	2.92168	1	1	1	1	1	1	1	1	1	1	1	1	1	1	1	1	0.81124	0.214612	0.390336	0.302994	0.429795	1.25671	0.906522	1.62346	8	9.62351	0.837064	0.961618	2.10542	1.06436	0.5	4	4	3
361	6	0	0	9	2.19722	48.6873	1.68742	0.42	79.4	6	-0.377872	1.89984	0.777756	372.937	2.57164	1	1	1	0	1	0	0	1	1	0	0	0	1	1	0	1	0.667446	0.191781	0.1808	0.135329	0.293839	1.154	0.832432	4.11534	6	2.28783	0.619525	0.711886	1.49218	1.00517	0.549502	4	2	1
362	6	0	1	1	0	46.8728	1.67092	0.32	73.45	4.9	-0.492714	1.86599	0.687026	145.215	2.16201	0	0	0	0	0	0	0	0	0	0	0	0	0	0	0	1	0.642572	0.146119	0.167251	0.0526946	0.252159	1.01928	0.735256	63.4065	1	0		0	0	0	0	3	1	1
363	6	0	0	4	1.38629	55.8131	1.74674	0.55	111.41	6.7	-0.255303	2.04694	0.827624	165.017	2.21753	0	0	1	0	0	0	0	0	0	1	1	1	0	0	0	0	0.765132	0.251142	0.253689	0.0598802	0.332461	1.08847	0.785162	2.39842	3	0.668762	0.804815	0.628086	1.80407	1.02965	0.62	3	3	1
364	6	0	0	4	1.38629	46.0641	1.66336	0.38	106.05	1.9	-0.421256	2.02549	0.272109	420.792	2.62407	0	1	0	0	0	0	0	1	1	0	0	0	1	0	0	0	0.631485	0.173516	0.241484	0.152695	0.299795	1.20258	0.867477	3.88325	4				1.06762	0.691761	0.498615	4	2	1
365	6	0	1	4	1.38629	42.0312	1.62357	0.34	51.64	2.7	-0.471392	1.71296	0.438606	650.165	2.81302	1	0	0	0	0	0	0	0	0	0	0	0	0	1	1	1	0.576198	0.155251	0.117588	0.235928	0.271241	1.18692	0.85618	8.15267	3	0.295108	0.643373	0.50031	1.73654	0.818078	0.52454	3	1	1
366	6	0	1	1	0	50.3967	1.7024	0.34	80.34	4	-0.466205	1.90496	0.602644	89.1089	1.94992	1	0	0	0	0	0	0	0	0	0	0	0	0	0	0	0	0.69088	0.155251	0.18294	0.0323353	0.265352	0.970058	0.699749	9.06222	1	0		0	0	0	0	3	1	1
[truncated: 1 more columns]
